## Review Article

# Role of calcium-sensor proteins in cell membrane repair

ZiWei Li and  Gary S. Shaw

Department of Biochemistry The University of Western Ontario, London, Ontario N6A 5C1, Canada

**Correspondence:** Gary S. Shaw (gshaw1@uwo.ca)

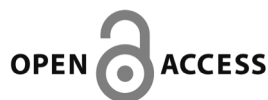

Cell membrane repair is a critical process used to maintain cell integrity and survival from potentially lethal chemical, and mechanical membrane injury. Rapid increases in local calcium levels due to a membrane rupture have been widely accepted as a trigger for multiple membrane-resealing models that utilize exocytosis, endocytosis, patching, and shedding mechanisms. Calcium-sensor proteins, such as synaptotagmins (Syt), dysferlin, S100 proteins, and annexins, have all been identified to regulate, or participate in, multiple modes of membrane repair. Dysfunction of membrane repair from inefficiencies or genetic alterations in these proteins contributes to diseases such as muscular dystrophy (MD) and heart disease. The present review covers the role of some of the key calcium-sensor proteins and their involvement in membrane repair.

## Introduction

The plasma membrane is a protective barrier for cells, made up of a phospholipid bilayer with embedded proteins that carry out specific functions. An intact plasma membrane is vital for cell integrity and maintaining homeostasis providing a stable, yet semipermeable, platform for proteins and lipids to conduct nutrient intake, vesical transport, enzyme secretion and signaling within and outside of the cell. Unlike cell walls in plant and bacterial cells that provide greater structural support and strength, the plasma membranes of animals are more fragile and susceptible to injuries from the surrounding environment that can damage the phospholipid bilayer, eventually leading to cell death. Multiple mechanisms are possible to tear or rupture the plasma membrane including injury from mechanical, chemical, or bacterial/viral sources [1,2]. For example, in cardiac and skeletal muscle, the high mechanical stress placed on muscle fibers due to repeated contractions causes the plasma membrane in these cells to frequently rupture. Over time, the constant breaching of the plasma membrane in cardiac muscle cells can lead to heart failure. Reactive oxygen species through mitochondrial dysfunction can cause oxidation of proteins and lipids leading to pores in cell membranes, especially in cells with large numbers of mitochondria and increased metabolic activity such as liver and brain [3–5]. Chemical and mechanical cell damage occurs in oral cavities due to brushing, chewing, and tobacco usage [6,7]. Damage to skin cells is induced by ultraviolet radiation and physical abrasion [8]. Defects in neuronal membrane integrity are common in neurological conditions, including traumatic brain and spinal cord injuries, Parkinson's disease [9], and Alzheimer's disease [10]. Myocardial damage including ischemia-reperfusion injury can lead to heart failure [11–13]. Infection by pathogenic bacteria, viruses, and pore-forming toxins (PFTs) can result in transmembrane lesions at the cell membrane [14,15]. Bacteria associated with *Shigella* or *Salmonella* that cause intestinal infections utilize a 'needle-like' protein apparatus to breach a membrane and secrete proteins into host cells [16]. The spike protein of SARS-CoV2 latches on to cells and then uses the host's enzymatic system to fuse with the plasma membrane to create a pore that facilitates infection [17]. In these cases, it is unclear what damage to the plasma membrane has been left behind. Several excellent reviews on the mechanisms and outcomes of plasma membrane rupture are available [11,12,18,19].

Received: 09 September 2022

Revised: 20 January 2023

Accepted: 01 February 2023

Accepted Manuscript online:

02 February 2023

Version of Record published:

27 February 2023

Nonetheless, cells have a remarkable ability to survive membrane disruption, frequently involving complex networks of proteins and lipids that patch a membrane lesion and return the cell to normal function. Multiple studies have demonstrated that calcium is a necessary requirement for membrane repair following disruption. For example, membrane-fusion that seals a torn plasma membrane is observed in sea urchin eggs, triggered by the rapid influx of extracellular calcium ions ( $\text{Ca}^{2+}$ ) [20]. In contrast, membrane damage is not repaired when  $\text{Ca}^{2+}$  is absent from the external environment, resulting in continuous spillage of cytoplasmic contents and cell death. Furthermore, upon microelectrode puncture wounding of frog skeletal muscle fibers seal effectively in the presence of  $\text{Ca}^{2+}$  but is suppressed at low  $\text{Ca}^{2+}$  concentrations [19]. In addition, frog oocytes wounded by microneedle fail to reorganize microtubules and heal the lesion in a  $\text{Ca}^{2+}$ -free environment [21]. The key step in these membrane repair processes is the sensing of abnormal cytosolic  $\text{Ca}^{2+}$  concentrations by specific membrane repair proteins including dysferlin, synaptotagmins (Syt), caveolins, TRIM72, annexins, and others. Several excellent reviews have been published that describe different aspects of membrane repair [22–27]. In the present review, we focus on the roles of calcium-sensor proteins in membrane repair and the implications of dysfunctional membrane repair proteins on human disease.

## Defective membrane repair is causative for multiple human diseases

Pathological conditions and chemical exposure that compromise the membrane repair process or membrane integrity pose immediate threats to cell survival. Generally, the location of the defective repair process dictates the type of illness or disease. Mutations in several genes that encode membrane repair proteins contribute to diseases such as muscular dystrophy (MD), gastrointestinal diseases, and heart disease [28,29]. The development and maintenance of skeletal and cardiac muscle is particularly affected (Figure 1) [30]. For instance, according to the Human Gene Mutation Database ([www.hgmd.cf.ac.uk](http://www.hgmd.cf.ac.uk)), nearly 400 missense mutations in the *DYSF* gene, responsible for the membrane repair protein dysferlin, are documented to cause weakness and deterioration in muscles of the arms and legs and manifested in multiple forms of limb-girdle muscular dystrophy (LGMD), Miyoshi myopathy, or general dysferlinopathies. Patients with Miyoshi myopathy also display early myocardial dysfunction prior to developing more serious cardiovascular problems. Similarly, over 350 mutations in the *CAPN3* gene (calpain-3) have been identified where >90% are linked to LGMD. Mutations in the transmembrane protein caveolin-3, also involved in membrane repair, are causative for LGMD and ‘rippling-muscle’ disease but also implicated in cardiomyopathies and sudden-infant death syndrome [31]. Some rare disorders such as chronic inflammation of muscle cells are also characterized by changes in proteins involved in membrane repair [32]. An uncontrolled autoimmune response in skeletal muscle is believed to begin with a deficiency of Syt VII (Syt7) that results in autoantibodies-targeting TRIM72. The continued inflammatory response eventually leads to muscle degeneration [30,33,34]. While not involved in membrane repair dystrophin co-ordinates a large protein complex near the sarcolemma of muscle cells to maintain membrane integrity and prevent injury, especially during contraction. Deletions, truncations, or mutations of the gene (*DMD*) for dystrophin are responsible for Duchenne or Becker forms of MD [30,35,36].

Multiple studies show that defects in membrane repair are manifested in different cardiac and lung diseases. The oxidative stress of ischemic injury and subsequent reperfusion is thought to trigger membrane repair proteins. Dysferlin, annexins, and TRIM72 are up-regulated in the latter stages of heart failure [11,37], perhaps in a last-ditch effort to rescue cardiac cells. Annexin A1 (ANX1) deficiency results in cardiac necrosis and fibrosis following myocardial infarction and other annexin proteins are up-regulated in a failing heart [38,39]. Recombinant TRIM72 has been shown to have a protective role and stabilize myofibers [40] and improve membrane repair in the heart [41,42]. As a result, administration of TRIM72 has been suggested as a possible therapeutic route following myocardial infarction [43]. Truncation and missense mutations have been observed in the repair protein AHNK in congenital heart disease patients [44] and a missense mutation in apoptosis-linked gene 2 (ALG-2, also called programmed cell death 6 protein [PDCD6]) is observed in patients with left ventricular noncompaction [45]. Impaired left ventricle function has also been identified in patients carrying missense mutations in the dysferlin gene. In the lungs, both caveolin-1 and TRIM72 are important in the repair of epithelial cells in lung tissue [46,47]. The absence of either of these proteins causes abnormalities and diminishes the repair process.

Currently permanent solutions for any form of MD or inflammatory myopathies are not available for patients [11,30]. However, stimulating membrane sealing with gene therapy approaches appears to be a promising therapeutic strategy. Gene replacement strategies using overlapping viral vectors have been used in mice [48]. Exon skipping has been used to replace protein-coding and noncoding regions in the *DYSF* gene to rescue membrane repair in patient fibroblast cells [49]. In addition, CRISPR methods in patient-derived stem cells can be used to replace missense mutations in the *DYSF* gene [50].

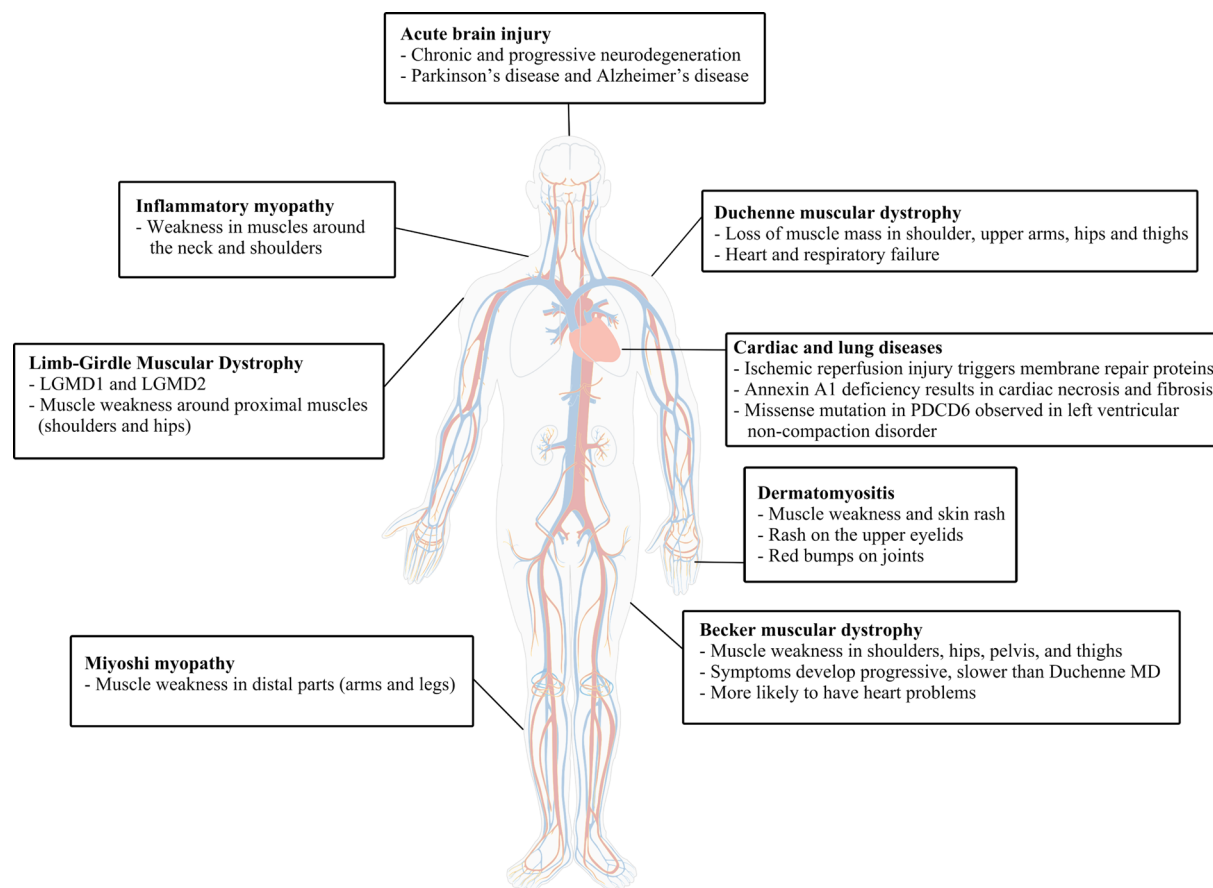

**Figure 1. Pathological conditions and symptoms associated with membrane repair pathways**

Duchenne and Becker MD result from loss of muscle mass. Duchenne MD is also associated with increased risk of heart and respiratory failure, while Becker MD patients develop symptoms slower than Duchenne MD. LGMD (LGMD1 and LGMD2) manifests in the proximal muscles around the hips and shoulders. Miyoshi myopathy manifests in distal muscles, mainly in legs. Inflammatory myopathy is associated with weakness in the large muscles around the neck, shoulders, and hips. Two types of inflammatory myopathy are polymyositis and dermatomyositis that cause lung inflammation. Acute brain injury can lead to chronic and progressive neurodegeneration such as Parkinson's disease and Alzheimer's disease. Defects in membrane repair contribute to different cardiac and lung diseases.

## A calcium surge triggers membrane repair

The  $\text{Ca}^{2+}$  ion is accepted as an evolutionarily conserved cellular signaling molecule originally shown to control heart contraction and neurotransmitter release [54,55]. Through binding to a wide variety of proteins,  $\text{Ca}^{2+}$  has the ability to initiate conformational changes that signal muscle contraction, synaptic transmissions, and enzymic function [56]. Furthermore,  $\text{Ca}^{2+}$  can neutralize the negative potential of proteins and membrane surfaces fine-tuning electrostatic gradients in the cell. The observation that nearly all aspects of cellular life are affected by  $\text{Ca}^{2+}$  requires intracellular  $\text{Ca}^{2+}$  concentrations to be tightly regulated. Cytosolic  $\text{Ca}^{2+}$  concentrations are maintained near  $\sim 100$  nM by calcium transporters that actively pump  $\text{Ca}^{2+}$  ions from the cytosol to extracellular space ( $\text{Na}^+/\text{Ca}^{2+}$  exchangers, voltage-dependent  $\text{Ca}^{2+}$  channels), from the cytosol to the endoplasmic reticulum (sarco/endoplasmic reticulum calcium ATPase, SERCA) or  $\text{Ca}^{2+}$ -channels (ryanodine receptor, IP3 receptor) that release calcium from the endoplasmic reticulum to the cytosol [56,57]. In addition, calcium-sensor proteins with high affinities ( $K_d = 10^{-9}$  M) or high calcium capacity act as sponges to limit  $\text{Ca}^{2+}$  in the cytosol [58]. This results in steep concentration gradients between cytosolic  $\text{Ca}^{2+}$  levels and extracellular (2–3 mM) or intracellular storage (0.5–1 mM) environments. In many signaling processes, intracellular  $\text{Ca}^{2+}$  concentrations increase to 1–10  $\mu\text{M}$ , controlled by  $\text{Na}^+/\text{Ca}^{2+}$  exchangers or voltage-gated  $\text{Ca}^{2+}$  channels, in response to ligand binding or changes in membrane potential. Here, EF-hand  $\text{Ca}^{2+}$ -binding proteins such as troponin-C and calmodulin have calcium affinities that are finely tuned to bind  $\text{Ca}^{2+}$

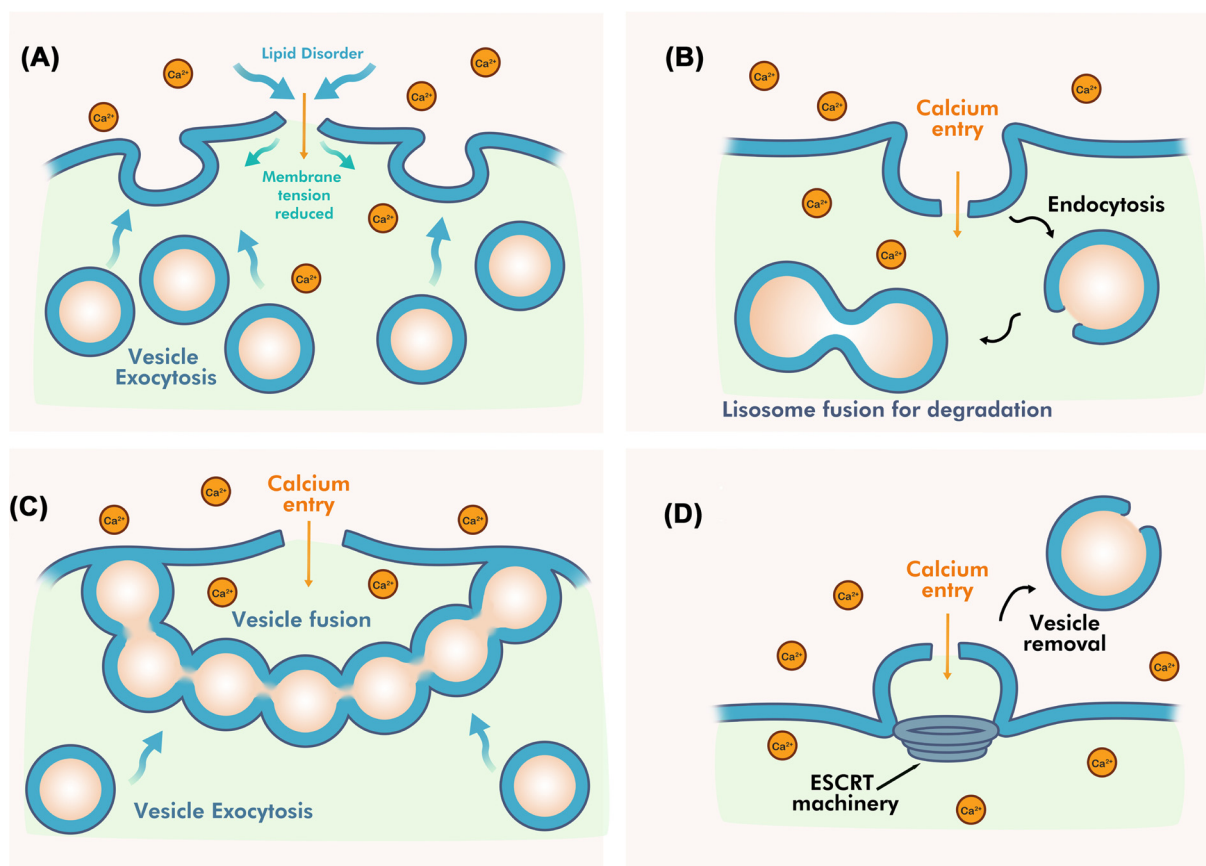

**Figure 2. Active membrane repair pathways**

Larger lesions in a plasma membrane are repaired by (A) Exocytosis, (B) Endocytosis, (C) Patching and (D) Shedding. (A) Calcium influx activates vesicular exocytosis events. (B) Inward budding reseals small lesions (<100 nm) by creating lesion-containing vesicles that fuse with lysosomes targeted for endo-lysosomal degradation. (C) Exocytotic-induced vesicles fuse at the rupture site, forming a large patch that isolates the rupture site. (D) Shedding repairs holes by outward budding and pinching off of vesicles containing the damaged portion of the plasma membrane.

ions, undergo conformational changes and modulate interactions with other proteins to stimulate muscle contraction or enzymatic action [59–62].

Unlike this controlled import of Ca<sup>2+</sup> in response to stimuli, membrane rupture causes a rapid, unrestrained influx of extracellular Ca<sup>2+</sup> into a cell around the rupture site, resulting in an overwhelming surge in cytosolic Ca<sup>2+</sup> [63]. In the absence of appropriate mechanisms to reseal the membrane fault, toxic levels of intracellular Ca<sup>2+</sup> promote apoptosis and cell death. For small pores (<1 nm), membrane repair likely occurs using thermal fluctuations of phospholipids to reseal a hole, first observed in liposomes and red blood cells [64,65]. The mechanism relies on the unfavorable lipid disorder energetics of the hydrophobic phospholipid backbone exposed to the hydrophilic surroundings created at the rupture site [64,66]. As a result, an increase in surface energy drives lipids at the rupture site to form curved edges to minimize pore edge tension. Most injuries induced by mechanical or chemical stress produce larger membrane holes (>10 μm<sup>2</sup>) that are repaired rapidly (<10–30 s) [67,68]. In the presence of additional oxidative stress, this time frame can be extended (100–300 s) [69]. In all cases, membrane lesions require specialized repair mechanisms to detect and determine the nature of the injury, then treat it with Ca<sup>2+</sup>-sensitive proteomic machinery.

## Membrane-resealing pathways

In general, there are about four calcium-sensitive mechanisms used by cells to repair larger holes in the plasma membrane: exocytosis, endocytosis (internalization), patching, and shedding (externalization) (Figure 2) [20,26,70–72]. In exocytosis, damage to the plasma membrane triggers Ca<sup>2+</sup> influx and the localization of intracellular vesicles to the damaged site within seconds. Subsequent fusion of vesicles to the inner surface of the plasma membrane has been

observed in sea urchin eggs, endothelial cells, and fibroblasts (Figure 2A) [20,73]. This mechanism that artificially adds more lipids via vesicle fusion to a broken plasma membrane reduces membrane tension efficiently. Membrane patching is similar to the exocytosis-mediated repair mechanism and also utilizes intracellular compartments. This  $\text{Ca}^{2+}$ -dependent vesicle-vesicle fusion event is observed in starfish oocytes and sea urchin eggs [67]. The patching model relies on the rapid  $\text{Ca}^{2+}$ -dependent fusion of vesicles to form a large multicompartiment barrier that encompasses and fuses with the plasma membrane at the rupture site. This model allows sealing of much larger holes in the membrane ( $>10$  nm in diameter) within seconds. The underlying proteomic machinery for exocytosis and patching requires  $\text{Ca}^{2+}$ -sensor proteins that detect the injury sites and promote vesicle-vesicle and vesicle-plasma fusion events. Candidate  $\text{Ca}^{2+}$  sensor proteins for these mechanisms include members of the Syt and annexin protein families and dysferlin [12,74–77].

The endocytosis mechanism reseals membrane holes ( $<100$  nm) through inward budding where the damaged plasma membrane is pinched off. The resulting lesion-containing vesicle then fuses with lysosomes and is targeted for endo-lysosomal degradation [78]. Membrane lesions induced by the bacterial toxin streptolysin O (SLO) show rapid  $\text{Ca}^{2+}$ -dependent resealing by this mechanism [79]. The shedding mechanism repairs holes by outward budding of vesicles containing the damaged portion of the plasma membrane [80]. This mechanism utilizes proteins of the Endosomal Sorting Complex Required for Transport (ESCRT) machinery to repair smaller holes ( $<100$  nm) [71]. As with endocytosis, the shedding mechanism appears to be used to repair SLO-infected cells [72,79]. In addition,  $\text{Ca}^{2+}$  activation promotes the accumulation of multiple proteins near the site of the membrane lesion, assembling a barrier that plugs the lesion to limit the loss of cytosolic media. The annexin protein family are major  $\text{Ca}^{2+}$  sensors for this protein accumulation process [81], and annexins appear to work with other proteins including the S100 proteins, dysferlin, and TRIM72 (MG53) during membrane repair [82–84].

## Different roles for $\text{Ca}^{2+}$ sensor proteins in membrane repair

### Syt1 and Syt7 and soluble *N*-ethylmaleimide-sensitive factor attachment protein receptor proteins in exocytosis

The Syt family of  $\text{Ca}^{2+}$ -binding proteins regulates  $\text{Ca}^{2+}$ -dependent exocytosis in several cell types. The process is especially well characterized in neurons for neurotransmitter release from synaptic vesicles [85]. Syt proteins consist of 17 isoforms in mammals that each have an N-terminal transmembrane region, a variable length linker region and two cytosolic C2 domains (C2A, C2B) [86–88], first identified in protein kinase C [89,90]. Multiple structures of C2 domains from different Syt proteins show these share a conserved  $\beta$ -sandwich fold of eight antiparallel  $\beta$ -sheets connected by surface loops [91–96]. Most isoforms show tissue-specific distribution, whereas only nine isoforms (Syt1–Syt7, Syt9, Syt10) have C2 domains that bind calcium [97]. Typically, C2 domains bind two to three  $\text{Ca}^{2+}$  ions although up to four sites are identified when comparing multiple family members [98–100]. Calcium binding is controlled by a series of loops and water molecules at one end of the  $\beta$ -sandwich structure. The C2A domain of Syt1 binds three  $\text{Ca}^{2+}$  ions with  $K_d$  of 54, 530  $\mu\text{M}$ , and a very low affinity of  $>20$  mM. Its C2B domain binds two  $\text{Ca}^{2+}$  ions with  $K_d$  of 300–400 and 500–600  $\mu\text{M}$  [100–102]. However, the intrinsic  $\text{Ca}^{2+}$  affinities of the Syt proteins are distinct in different isoforms. For instance, Syt7 has the highest  $\text{Ca}^{2+}$  sensitivity, having a half-maximum binding of  $\text{Ca}^{2+}$  at 1.5  $\mu\text{M}$  for the C2A domain and 2.5  $\mu\text{M}$  for the C2B domain [103].  $\text{Ca}^{2+}$ -binding does not cause a significant conformational change in the C2 domains, rather it modifies the electrostatic surface potential that allows the C2 domains to interact with phospholipids and intensifies  $\text{Ca}^{2+}$  binding [91,99,104]. As a result, substitutions to ligating residues in Syt severely dampens both  $\text{Ca}^{2+}$  binding and phospholipid interactions.

The most comprehensively studied Syt isoform is the neuronal Syt1, shown to be the principal  $\text{Ca}^{2+}$  sensor that triggers neurotransmitter release through exocytosis [105,106]. Syt1 functions with the Soluble *N*-ethylmaleimide-sensitive factor Attachment protein Receptor (SNARE) proteins synaptobrevin 2, SNAP-25 (25 kDa synaptosomal-associated protein) and syntaxin 1 to trigger membrane fusion between a synaptic vesicle and the plasma membrane [107]. SNARE proteins are anchored to the vesicle (synaptobrevin 2) or plasma (SNAP-25, syntaxin 1) membrane via either a transmembrane domain or post-translation modification (Figure 3A). Although multiple models have been proposed [108–111], one recent model based on X-ray structures indicates assembly of the SNARE proteins into a partial four-helix bundle structure may be important to understand the exocytosis model for the repair progress [112,113]. This remains to be validated.

Evidence suggests that in the absence of  $\text{Ca}^{2+}$ , a prefusion complex is formed between the three SNARE proteins, the cytosolic protein complexin and Syt1 that brings the vesicle and plasma membrane surfaces into close proximity ( $<4$  nm, Figure 3B) [112,114,115]. This allows the SNARE proteins to form a partial four-helix bundle in complex with two molecules of Syt1 that reside on a synaptic vesicle. One molecule of Syt1 interacts with

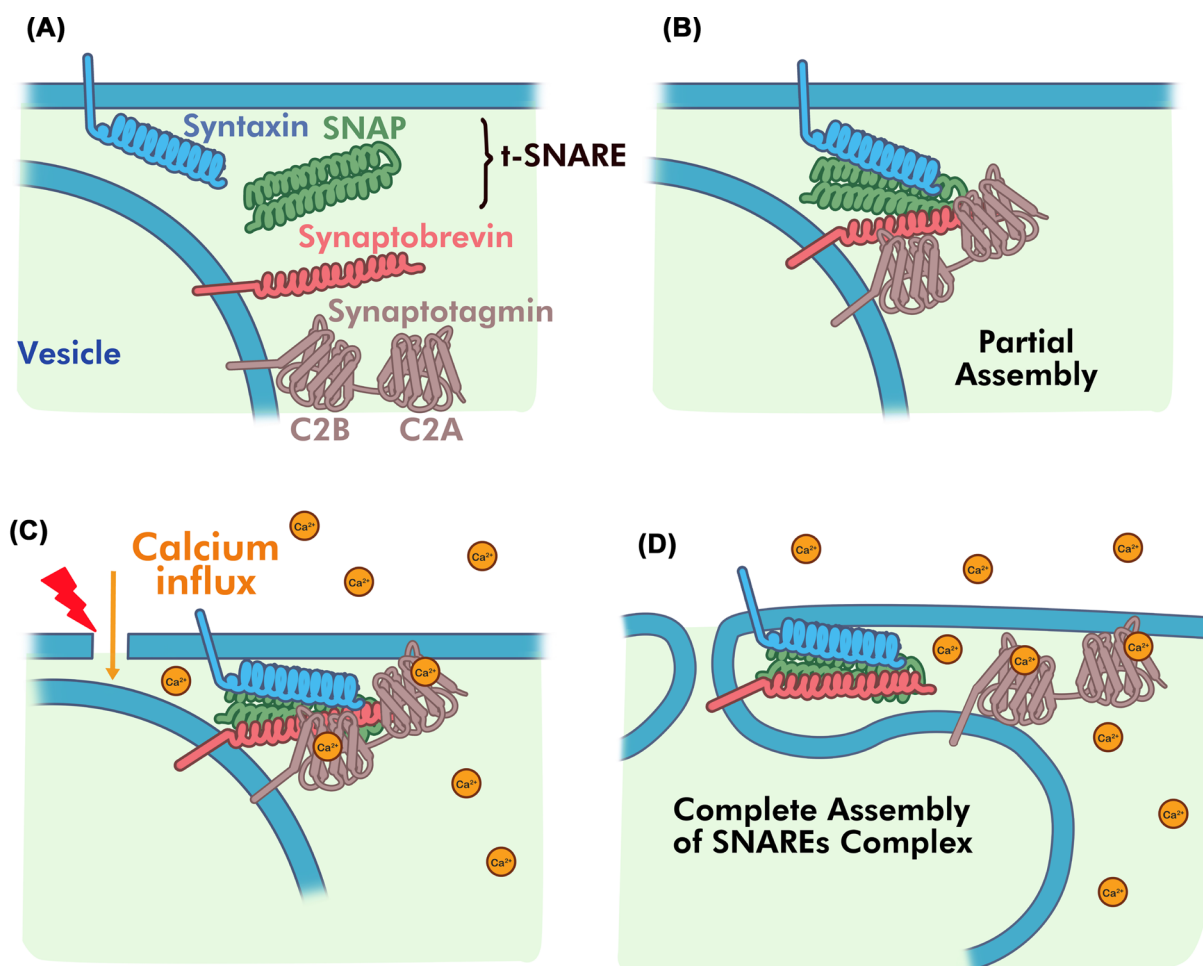

**Figure 3. Model of SNARE assembly and membrane fusion**

(A) Locations of the SNARE and Syt1 near the plasma membrane vesicle membrane interface in the absence of calcium influx. The SNARE proteins syntaxin1 (cyan) and SNAP-25 (green) localize on the plasma membrane while synaptobrevin 2 (red) and Syt1 (gray) localize to the vesicle membrane. The C2A and C2B domains of Syt1 are not bound to  $\text{Ca}^{2+}$ . (B) In the prefusion state, Syt1 interacts with the partially assembled SNAREs to form an inhibitory complex in a  $\text{Ca}^{2+}$ -independent manner. (C)  $\text{Ca}^{2+}$  channel opening causes  $\text{Ca}^{2+}$  influx, resulting in  $\text{Ca}^{2+}$  binding to the Syt1 C2 domains. (D) The  $\text{Ca}^{2+}$ -bound C2 domains intercalate into the neighboring plasma or vesicle phospholipid membrane releasing the SNARE complex.

the syntaxin/synaptobrevin/complexin components while a second molecule interacts on the opposite side of the SNARE complex with SNAP-25. In both cases, the C2B domain appears to be the major interacting region with the SNARE complex. Upon calcium entry, and  $\text{Ca}^{2+}$  binding to Syt1 (Figure 3C), the Syt1 interaction with synaptobrevin/complexin is released and the  $\text{Ca}^{2+}$ -filled C2 domains intercalate with either the plasma or vesicle membranes that allows the SNARE proteins to ‘fully-zipper’ and facilitate fusion of the two membranes (Figure 3D) [111]. The sensing role of Syt1 is critical for full SNARE assembly and release of inhibition since deletion of Syt1 or substitutions in the C2B domain impair neurotransmitter release [116]. The energy released from the full assembly of the SNAREs, and neutralization of the acidic  $\text{Ca}^{2+}$ -binding loops in Syt1 appear to be the driving force to overcome fusion of the similarly negative-charged vesicle and plasma membranes [115,117,118]. Loss of Syt1 causes a reduction in membrane integrity that is magnified under stress conditions such as salt and freezing in plants [119,120].

Syt7, widely expressed in neuronal and non-neuronal tissues, is proposed to have a calcium-sensing role in membrane repair. Syt7 is located on the membrane surfaces of lysosomes and nonsynaptic secretory granules. Early work showed that Syt7 regulates membrane repair in fibroblasts via calcium-sensitive lysosome exocytosis [121]. Knock-down of Syt7 results in a reduction in exocytosis of pancreatic  $\beta$ -cells’ secretory granules [122] and defects in lysosomal exocytosis and membrane repair are noted in Syt7-deficient mice [34]. Syt7 shares some features with Syt1 and

mechanistic features for possible membrane repair by Syt7 can be gleaned from the role of Syt1 in synaptic vesicle fusion. For example, *in vitro* assays show  $\text{Ca}^{2+}$  binding promotes SNARE-mediated membrane fusion. Syt7 exhibits strong  $\text{Ca}^{2+}$ -sensitive binding to phospholipids and the plasma membrane SNARE proteins syntaxin 1A and SNAP-25 [123]. Furthermore, lysosomal exocytosis studies show interactions between Syt7 and SNAP-23 are facilitated by syntaxin 4, but not by syntaxins 2, 3, or 6 [124]. Pulldown assays detect interactions between TI-VAMP/VAMP7 and SNAP-23 with the C2A domain of Syt7 under 1 mM  $\text{Ca}^{2+}$  but not with the Syt1 C2A domain [124]. Botulinum neurotoxin E cleavage of SNAP-23 severely inhibits lysosomal exocytosis, indicating that interactions of Syt7 with some isoforms of SNARE proteins may play a key role in membrane resealing [124].

## Membrane patching by dysferlin

The membrane repair protein dysferlin is a large, tail-anchored transmembrane protein in the Ferlin family of vesicle fusion proteins. It is expressed in many tissues [76] but is particularly abundant in skeletal and cardiac muscle where dysferlin is localized to cytoplasmic vesicles and the sarcolemma. Dysferlin-deficient mice display defective  $\text{Ca}^{2+}$ -dependent sarcolemma repair and develop forms of slow, progressive MD [125–127]. Consistent with its role in membrane repair, mutations in the dysferlin gene are linked to two diseases characterized by muscle weakness, Miyoshi myopathy and LGMD type 2B (LGMD2B) [51,52]. Furthermore, immunolabeling experiments of dystrophic skeletal muscle display extreme reductions of dysferlin at the sarcolemma [128]. Dysferlin-null myofibers initially survive contraction-induced injury but eventually succumb to inflammation and necrosis in the absence of membrane repair. On the other hand, wild-type muscle cells can survive large-strain injury by sarcolemma membrane repair [126]. Reintroduction of the dysferlin gene into dysferlin-null mice promotes rapid recovery of skeletal muscles from contraction-induced injury [129]. Dysferlin-deficient cells are more prone to injury following mechanical membrane stress [130,131]. These findings suggest that dysferlin is vital in mediating the recovery of membrane rupture and maintaining membrane integrity in muscle fiber cells.

Dysferlin comprises seven C2  $\text{Ca}^{2+}$ -binding domains (C2A–C2G) and two accessory domains (C2-FerA, DysF) anchored to vesicle surfaces and the sarcolemma in muscle cells by a C-terminal transmembrane domain. *In vitro* studies show the C2 domains bind one to two  $\text{Ca}^{2+}$  ions and display a wide range of  $\text{Ca}^{2+}$ -binding affinities [132]. For instance, dissociation constants ( $K_d$ ) between 1 and 3  $\mu\text{M}$  have been measured for individual sites in the C2A and C2C domains, whereas sites in the C2D and C2E domains have affinities well above 500  $\mu\text{M}$  [132]. Protein–lipid overlay assays show that the dysferlin C2 domains have diverse affinities and  $\text{Ca}^{2+}$  dependencies for different lipid types. All C2 domains of dysferlin bind phosphatidylserine (PS) lipids in a  $\text{Ca}^{2+}$ -independent fashion that is enhanced in four of the C2 domains (C2A, C2E, C2F, and C2G) upon  $\text{Ca}^{2+}$  binding [132]. The C2A domain exhibits the highest  $\text{Ca}^{2+}$ -induced association with PS and phosphoinositide [133]. High-resolution structures are available for the C2A domain [134,135] and the DysF domain [136,137] from dysferlin. Like the Syt proteins, structures show that the C2A domain forms a  $\beta$ -sandwich structure with the  $\text{Ca}^{2+}$  loops at one end of the fold [134,135]. Missense mutations in each of the C2 domains of the dysferlin gene cause rare forms of MD, implying that altering a single C2 domain is sufficient to disrupt its membrane repair function [138]. This could arise from defects in domain folding, association with binding partners, improper lipid interactions or alterations in the overall tertiary structure [138,139].  $\text{Ca}^{2+}$  binding to the C2A domain does not induce large conformational changes but rigidifies the  $\text{Ca}^{2+}$ -binding loops important for lipid binding [135]. Structures of the remaining C2 domains are not available but have been predicted by RoseTTAFold and AlphaFold2 programs. Early predictions suggested that dysferlin adopts a flexible ‘beads on a string’ tertiary structure with the C2A domain furthest from the membrane surface [140,141]. More recently, modeling algorithms predict a more compact arrangement where all the C2 domains are packed together, along with the C2-FerA and DysF domains [142].

Dysferlin is proposed to direct calcium-sensitive membrane patching of the sarcolemma in skeletal and cardiac muscle cells (Figure 2C) [143]. This process is triggered by a rapid  $\text{Ca}^{2+}$  influx into cells causing a high  $\text{Ca}^{2+}$ -concentration zone around the rupture site. Vesicles recruited to the injury site fuse with one another forming a patch that anneals with the plasma membrane to reseal the rupture sites (Figure 4). Live-cell imaging using mechanically wounded rat myocytes shows dysferlin-containing vesicles transport along microtubules toward the injury site [144]. It is unclear what vesicles are involved, yet these undergo rapid fusion to form larger vesicles in the cytoplasm rather than directly accumulating at the rupture sites. The proposed role of  $\text{Ca}^{2+}$  is to trigger formation of large dysferlin-containing vesicles that act as a ‘patch’ to repair large lesions [144]. Since dysferlin contains a transmembrane domain anchored to phospholipids in both vesicle and plasma membranes, it is thought to co-ordinate vesicle docking and fusion with help from cytosolic protein-binding partners that do not contain membrane-spanning

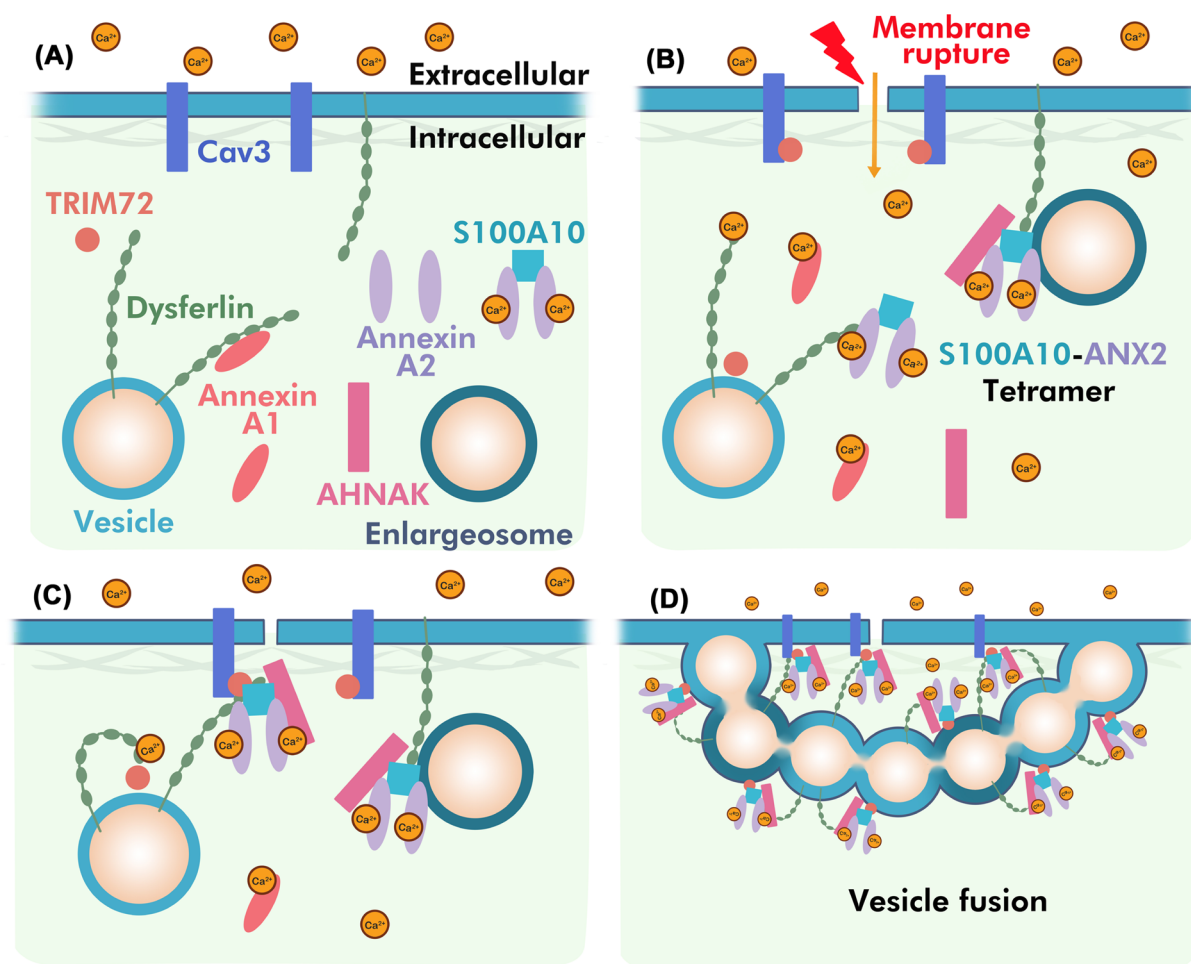

**Figure 4. Model of dysferlin-mediated vesicle fusion membrane repair**

(A) Dysferlin associates with plasma and vesicle membranes. Other proteins including TRIM72, AHNAK, and S100A10:ANX2 are mostly cytosolic. (B) Membrane rupture causes a local  $\text{Ca}^{2+}$  influx, binding to and activating  $\text{Ca}^{2+}$ -sensitive proteins such as dysferlin and ANX2. This enables multiple interactions between the proteins and causes recruitment of TRIM72 and AHNAK by dysferlin and S100A10:ANX2 to vesicle surfaces. (C)  $\text{Ca}^{2+}$ -dependent protein-protein interactions recruit vesicles such as enlargosomes to the injured plasma membrane facilitated by the complete dysferlin complex that spans the vesicle-plasma membrane space. (D) Multiple vesicles containing dysferlin and interacting proteins accumulate at the injured site forming a patch across the membrane lesion.

regions such as S100A10, Annexin A2 (ANX2), AHNAK, and TRIM72 (MG53) [82,145,146]. Supporting this, multiple large-scale proteomics experiments have identified interactions between dysferlin and over 100 other proteins, including many implicated in membrane repair [145,147,148]. Fluorescence-imaging experiments using mouse myoblasts show possible associations between dysferlin, TRIM72, and caveolin-3 (Cav3) that facilitates intracellular vesicle trafficking during acute damage membrane repair [82]. Furthermore, scrape injury experiments show that TRIM72 colocalizes and accumulates with dysferlin at the injury site, forming a lattice-like network near the lesion edges [68,82]. Substitutions in Cav3 influence dysferlin trafficking with TRIM72, in which significant amounts of TRIM72 and dysferlin are redistributed to the Golgi apparatus suggesting functional interactions between TRIM72 and dysferlin that is mediated by Cav3 [82,149]. Substitutions in Cav3 or TRIM72 knockout experiments display abnormal vesicular trafficking in mouse myoblasts, whereas dysferlin null experiments show normal vesicle accumulation near the sarcolemma, but defective membrane repair [76,82]. This suggests that dysferlin participates in the resealing process that requires protein partners to facilitate vesicle recruitment to injury sites [82]. Supporting this idea, pulldown assays show association between the dysferlin C2A domain and TRIM72 in the absence and presence of  $\text{Ca}^{2+}$ -free environment, that is dependent on the TRIM72 oligomerization state in an oxidation-dependent manner

[150]. Substitutions in the dysferlin domain (W52R and V67D) that are causative for muscle disease also alter its  $\text{Ca}^{2+}$  association with TRIM72 [150].

Amongst the many dysferlin partners is the giant muscle-cell protein AHNAK, shown to migrate to a membrane injury site under cellular stress. AHNAK is a cytosolic protein that associates with vesicles (enlargosomes) involved in exocytosis [151] in a  $\text{Ca}^{2+}$ -dependent manner. The absence of a transmembrane domain in AHNAK indicates its localization to a membrane surface is controlled by interactions with other partner proteins. Immunostaining of skeletal muscle shows colocalization of dysferlin and AHNAK at the sarcolemma of skeletal muscle [146]. Furthermore, coimmunoprecipitation coupled to mass spectrometry experiments shows interactions between dysferlin and AHNAK [146]. GST pulldown experiments indicate that the dysferlin C2A domain is most important for the recruitment of AHNAK [146]. This interaction appears to be calcium insensitive and dependent on the C-terminus of AHNAK. Proteomic experiments also identify the EF-hand protein S100A10 and phospholipid-binding protein ANX2 as members of the dysferlin complex [145,147]. Dysferlin and ANX2 co-accumulate at injury sites of the plasma membrane in a  $\text{Ca}^{2+}$ -sensitive fashion [152].

ANX2 forms a tight complex with S100A10 and the two proteins are frequently coisolated as a S100A10:ANX2 heterotetramer [153,154]. Yeast three hybrid experiments show S100A10:ANX2 interacts with a C-terminal region from AHNAK different from that used by dysferlin [155]. Furthermore, structural experiments show that AHNAK asymmetrically spans the complete heterotetramer utilizing two both S100A10 and ANX2 protomers [156–158]. These interactions paint a picture where AHNAK acts as a scaffold to recruit both S100A10:ANX2 and dysferlin [146,156]. However, the precise arrangement of these proteins, along with other candidate repair proteins such as TRIM72 and Cav-3, is unknown as are the mechanisms used for the repair process.

## Cysteine protease calpain enzymes sense membrane ruptures

Calpains are a large family of  $\text{Ca}^{2+}$ -sensitive cysteine proteases ubiquitously expressed as inactive proenzymes in most cell types [159]. Rather than being a degradative protease, calpains modify their substrate by cleavage and often confer a  $\text{Ca}^{2+}$ -signaling function. Two of the best studied enzymes, calpain-1 and calpain-2 are composed of a large 80 kDa catalytic subunit (CAPN1, CAPN2) with two protease core domains (PC1, PC2) that bind two  $\text{Ca}^{2+}$  ions and a small 30 kDa noncatalytic subunit (CAPNS1) [160–163]. Each subunit also contains a penta EF-hand domain that binds four additional  $\text{Ca}^{2+}$  ions. The cleavage activities of calpains are closely correlated to extracellular  $\text{Ca}^{2+}$  levels and typically require high  $\text{Ca}^{2+}$  levels such as those that occur during plasma membrane rupture. For example, calpain-1 and calpain-2 require between 5–50  $\mu\text{M}$  or 200–800  $\mu\text{M}$   $\text{Ca}^{2+}$  concentrations, respectively, to reach half-maximum activity [164]. Calpain-3 deficiency results in LGMD-recessive type 1 (LGMDR1) but has little effect on the survival of laser-wounded skeletal myotubes [165]. Decreased expression of calpain-1 and calpain-2 in mouse embryonic fibroblasts shows loss of sarcolemma-resealing activity, suggesting calpain-1 and -2 are required for calcium-dependent membrane repair [165]. Moreover, knockout of CAPNS1 inhibits  $\text{Ca}^{2+}$ -dependent resealing of membrane ruptures. However, knockout of either calpain-1 or calpain-2 has less effect on membrane repair, suggesting redundancy for protein cleavage events during membrane repair [165]. Consistent with a role in the repair of larger lesions, loss of both calpains decreases cell survival following mechanical membrane injury but is not impacted by small ruptures formed by SLO and saponin [166]. High-resolution microscopy shows that calpain inhibition prevents resealing of crayfish medial giant axons but does not prevent vesicle accumulation [167]. These findings indicate that calpains are required for  $\text{Ca}^{2+}$ -dependent survival after membrane injury [164] likely due to enhancing membrane fusion rather than vesical formation and protein recruitment at the injury site [167].

Calpains-1 and -2 proteolyze dysferlin between the C2E and C2F domains yielding a membrane bound C-terminal fragment [168]. Proteolysis requires extracellular  $\text{Ca}^{2+}$  provided by membrane rupture [68]. Interestingly, a genetic deletion in the dysferlin gene has also been identified that yields a similar C-terminal protein fragment ('mini-dysferlin'; includes C2F, C2G, and transmembrane domains) [169]. This dysferlin fragment resembles inverted Syt1, having its transmembrane anchor at the C-terminus rather than the N-terminus. When truncated dysferlin is expressed in dysferlin-null mice, isolated mice muscle cells show restored membrane repair function [169]. Furthermore, immunolabeling experiments show that the C-terminal fragment of dysferlin is detected at sites of membrane injury in human myoblasts, rather than the N-terminus [68,168]. Other experiments reveal that TRIM72 and mini-dysferlin-containing vesicles cluster at injury sites within 10 s following injury [68,170]. Mini-dysferlin and TRIM72 aggregate with exposed phospholipids to encircle the injury site, thus stabilizing the plasma membrane [68]. This mechanism appears to be most prominent in lung, liver, pancreas, and placenta (40–60%) rather than cardiac or skeletal muscle cells (10–15%) where low abundance the mini-dysferlin protein is detected [168]. Calpain-3 is also proposed to work as a regulatory enzyme for the dysferlin complex [171]. Immunostaining in cell cultures suggests

cleavage of AHNAK and the muscle specific-protein titin is regulated by calpain-3 perhaps, suggesting a role following membrane repair linked to cytoskeletal maintenance [166,172].

## Annexin complexes seal a membrane

The annexins are a family of  $\text{Ca}^{2+}$ -regulated phospholipid-binding proteins, with Annexins A1, A2, A4, A5, and A6 most known for their roles in membrane repair. Annexins include four to eight core domains that bind  $\text{Ca}^{2+}$  arranged in a right-handed superhelix and a unique, variable length N-terminal domain [173]. Under resting  $\text{Ca}^{2+}$  concentrations, most annexins diffusely distribute in their  $\text{Ca}^{2+}$ -free, inactivated state in the cytosol. In response to a  $\text{Ca}^{2+}$  influx from membrane injury,  $\text{Ca}^{2+}$  binding to the outer surface of the annexin protein facilitates interaction with the acidic phospholipid membrane. Calcium-binding sites in the annexins are located in the outer loop regions of the protein and display different calcium co-ordination patterns from EF-hand calcium-binding motifs [174,175]. Although the core domains are highly conserved in the annexin family, their relative orientations and numbers of bound  $\text{Ca}^{2+}$  ions differ amongst isoforms [175]. Crystal structures of Annexins A1 and A5 show six and four  $\text{Ca}^{2+}$ -binding sites, respectively [176,178]. It is thought that the range of calcium sensitivities by the annexins may be correlated with the size of the membrane hole. Furthermore,  $\text{Ca}^{2+}$  sensitivities for individual annexin proteins vary in the presence of phospholipids. For example, ANX1 and ANX2 have calcium  $K_d$  values of  $>1000$  and  $100\text{--}500\text{ }\mu\text{M}$ , respectively, without phospholipid [179–181,228]. In contrast, their affinities for  $\text{Ca}^{2+}$  increase in 10- to 100-fold with phospholipid present [177,179,228,229]. The higher calcium sensitivity of ANX2 may be due to its association with S100A10 that is unable to bind calcium (see below) [182]. The variable N-terminal domains of annexins are thought to provide specificity for different binding partners and in most cases these interactions are controlled by  $\text{Ca}^{2+}$  binding to the annexin protein. For instance, the N-terminal domain of ANX1 is buried within the core domains in the absence of  $\text{Ca}^{2+}$  and is released upon  $\text{Ca}^{2+}$  binding due to rearrangement of the core domains [183].

The relatively weak affinities and preference for phospholipid membranes make members of the annexin family perfect candidates for membrane repair. Furthermore, the variable N-termini provides a platform for binding partners found in different membrane-resealing pathways. Frequent binding partners for the annexin proteins are the S100 proteins, a family of dimeric, EF-hand proteins. For instance, the ANX1 and ANX2 co-ordinate with S100A11 and S100A10, respectively [157,158,184,185]. Most interactions of annexins with S100 proteins are also controlled by  $\text{Ca}^{2+}$  binding to the S100 protein, which typically bind two  $\text{Ca}^{2+}$  ions per protomer and have  $\text{Ca}^{2+}$  dissociation constants ranging from 10 to  $500\text{ }\mu\text{M}$  for the two  $\text{Ca}^{2+}$ -binding sites [186–188]. Calcium binding to most S100 proteins causes a significant conformational change that provides a hydrophobic surface used to recruit the N-terminal region from an annexin protein [184]. Numerous three-dimensional structures show the annexin N-terminus forms an amphipathic helix that bridges the S100 dimer [184,185,188]. Although annexins are found as monomers in the cytosol, binding to a dimeric S100 protein results in the formation of a noncovalent heterotetramer. One outlier in this mechanism is S100A10 that recruits ANX2 in the absence of  $\text{Ca}^{2+}$ . S100A10 is a unique member of the S100 family that has lost its ability to bind  $\text{Ca}^{2+}$  yet retains the  $\text{Ca}^{2+}$ -activated structure exhibited by other  $\text{Ca}^{2+}$ -bound S100 proteins [154,190]. The S100A10:ANX2 complex was originally isolated as a  $\text{Ca}^{2+}$ -insensitive p11p36 heterotetramer from intestinal epithelium cells [154]. Although other S100 proteins such as S100A4 and S100A11 can recruit ANX2 [191–195], S100A10 has been shown to bind to this annexin protein nearly three-orders of magnitude stronger. The S100A10:ANX2 complex is likely the predominant form used in membrane repair. In the absence of ANX2, S100A10 is rapidly degraded in cells [196]. In addition, it has been observed that oxidative stress results in glutathionylation of ANX2 in the S100A10:ANX2 heterotetramer, resulting in a loss of its ability to interact with phospholipids and F-actin, suggesting ANX2 is sensitive to oxidation that alters its conformation and function [197].

ANX1 and ANX2 aggregate with intracellular vesicles by interacting with dysferlin in a  $\text{Ca}^{2+}$ -dependent manner. Both ANX1 and ANX2 colocalize with dysferlin at the sarcolemma [53]. This association is disrupted in muscle cells lacking dysferlin [53], suggesting an interaction between dysferlin and annexins may be essential for vesical aggregation and fusion during membrane repair. ANX2 is known to stabilize and organize lipid microdomains and is proposed to regulate exocytosis events in chromaffin cells [198]. The S100A10:ANX2 complex also localizes at membrane injury sites [156]. Both ANX1 and ANX2 translocate to the membrane in damaged human and zebrafish muscle cells, although at different rates that may depend on localization prior to a rupture [199,200]. Annexin knock-out experiments display poor myofiber repair or muscle regeneration abilities [201–203]. A  $\text{Ca}^{2+}$ -insensitive version of ANX1 also inhibits membrane sealing [204]. Association between dysferlin and the S100A10:ANX2 complex is  $\text{Ca}^{2+}$  and injury dependent. Furthermore, a proposed model depicts that membrane-patching repair requires the interaction between dysferlin and ANX1 and ANX2 [205]. Abnormal localization of ANX1 and ANX2 has been found

in dysferlin-deficient mouse muscle cells [53]. Interestingly, fluorescence lifetime imaging microscopy (FLIM) experiments demonstrate significant interactions between dysferlin and ANX1 during resting physiological  $\text{Ca}^{2+}$  levels, and this interaction is lost in injured cells [53]. On the other hand, interactions between dysferlin and ANX2 are observed in resting and ruptured mice muscle cells, suggesting that each annexin protein may have a specific role in repair processes [53,206]. The recruitment of  $\text{Ca}^{2+}$ -activated ANX1 to a damaged region seems independent of S100A11. Immunolocalization assays show ANX1 concentrates around the rupture site in human breast cancer cells lacking S100A11 expression [205]. Interestingly, ANX1-deficient mice show little effect in  $\text{Ca}^{2+}$ -dependent myofiber repair compared with wild-type myofibers. Instead, increasing numbers of unfused differentiating myoblast suggest that the cell–cell fusion stage of myofiber formation was affected by the absence of ANX1, implying that ANX1 potentially participates in regulating membrane fusion, and other possible proteins may substitute its role in membrane repair [201].

Other annexin proteins are proposed to be important in membrane repair. Annexin A5 (ANX5) is rapidly recruited to a membrane injury site and binds to the curved edges of a damaged membrane. ANX5 self-assembles into two-dimensional (2D) protein arrays on PS-containing membranes, possibly stabilizing the membrane, and limiting wound expansion during membrane repair [207–209]. ANX5-null cells exhibit defective membrane repair that is reversed upon addition of recombinant ANX5 [210]. In contrast, an ANX5 variant that is unable to assemble into arrays, fails to rescue membrane repair ability.

Annexin A4 (ANX4) and A6 (ANX6) appear to work together to induce membrane curvature and wound closure. The smallest annexin member, ANX4, self-assembles into trimers on a membrane surface to induce curvature at rupture edges [211,212], allowing ANX6 to constrict and close of the wound [212]. Truncated ANX6 competes with and prevents translocation of wild-type ANX6 to alter assembly of the annexin repair complex [213]. Conversely, overexpression of ANX6 promotes membrane repair by increasing the formation of external vesicles at the site of membrane injury [213]. This repair strategy seems to depend on cell type and wound size, in which smaller lesions in metastatic cancer cells require actin remodeling and membrane restoration by the S100A10:ANX2 complex. On the other hand, larger wounds in metastatic cancer cells involve S100A10:ANX2 coupled to ANX4 and ANX6 for repair, suggesting diverse membrane repair mechanisms may be used to maintain membrane integrity [212].

## ALG-2 and ESCRT-mediated repair

ALG-2 (also PDCD6) is a highly conserved  $\text{Ca}^{2+}$ -binding protein in the penta-EF-hand (PEF) family. Although originally thought to be a proapoptotic signaling protein, ALG-2-deficient mice display little phenotypic changes to support this function [214]. Instead, ALG-2 displays an array of interacting protein partners that support a role in cell proliferation, vesicle transport, and membrane repair in many cell types [215–217]. ALG-2 includes a PEF domain characterized by utilizing the fifth EF hand for  $\text{Ca}^{2+}$ -independent dimer formation [218,219]. The first (EF-1) and third (EF-3) EF hands in ALG-2 possess the two highest-affinity  $\text{Ca}^{2+}$ -binding sites with  $K_d$  of 1.2 and 300  $\mu\text{M}$ , while EF-5 displays very weak  $\text{Ca}^{2+}$  binding.  $\text{Ca}^{2+}$  binding to EF-1 and EF-3 induces conformational changes that open a hydrophobic pocket near the N-terminus of ALG-2 for target recognition and binding, suggesting ALG-2 is a calcium sensor [218,219]. As a result, substitutions to the  $\text{Ca}^{2+}$  co-ordinating residues in EF-1 and EF-3 impairs  $\text{Ca}^{2+}$ -induced conformational changes that may directly alter ALG-2 function [220]. Consistent with this, immunofluorescence assays show ALG-2 localizes to the cytoplasm and nucleus of cells [221] but moves to the membrane fraction in the presence of  $\text{Ca}^{2+}$  [222].

A variety of ALG-2-interacting proteins have been identified that associate with vesicle and plasma membranes, including Annexins A7 (ANX7) and A11, ALG-2-interacting protein X (ALIX), and components of the ESCRT complex [218,227]. Membrane-wounding assays show  $\text{Ca}^{2+}$ -bound ANX7 nucleates at ruptured membrane edges along with ALG-2 following scrape injury, suggesting that ANX7 regulates the proper localization of ALG-2 to the injured membrane [227]. ESCRT proteins are organized into five functionally distinct complexes, shown to facilitate the repair of narrow membrane wounds (<100 nm) observed in PFT-injured cells [71]. Laser-induced membrane damage experiments show that ESCRTs facilitate cleavage of damaged regions of the cell membrane using ALG-2 and ALIX [223]. Particularly, ESCRT-III induces membrane deformation and scission to shed extracellular vesicles to remove damaged membranes [71,223,224]. The essential regulator protein ALIX has an important role in the recruitment of ESCRT-III components including CHMP4 [216,223,225,226]. On the other hand, knockdown of ALG-2 inhibits the recruitment of ALIX at the injury site but not vice versa [223]. Thus, Scheffer et al. proposed a model whereby ESCRT-mediated membrane repair requires the use of  $\text{Ca}^{2+}$ -activated ALG-2 to initiate the sequential recruitment of ALIX and ESCRT proteins to the lesion for membrane repair (Figure 5) [223,228].

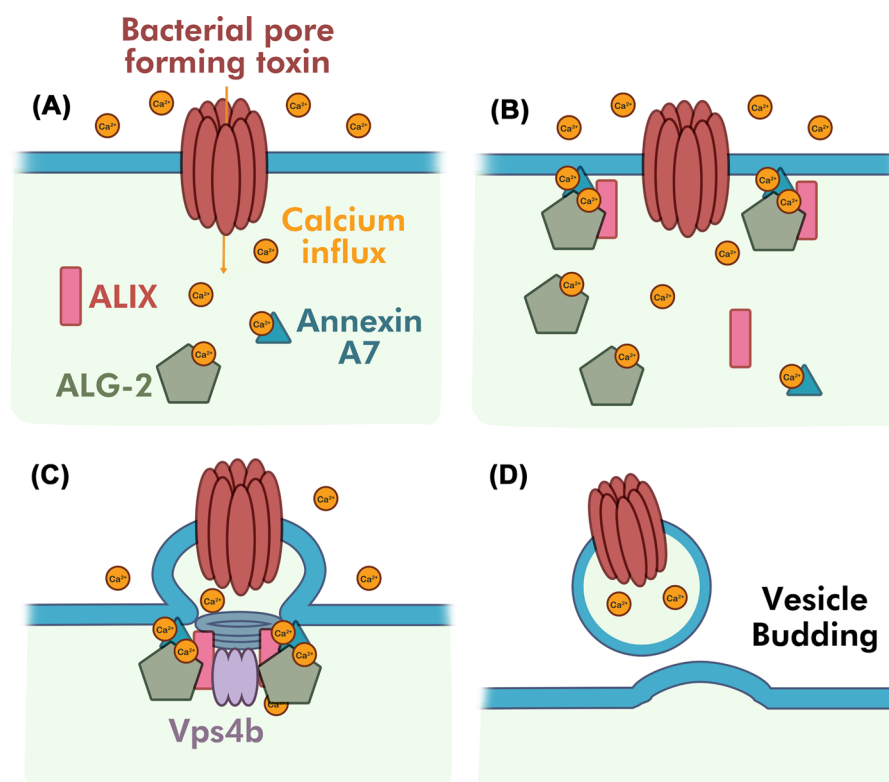

**Figure 5. Externalization repair via ESCRT-mediated shedding to remove bacterial PFTs**

(A) PFTs induce stable transmembrane protein-based lesions, which cannot simply repair by spontaneous membrane reseal.  $\text{Ca}^{2+}$  activates ANX7 and PEF protein ALG-2. ANX7 associate with ALG-2, and  $\text{Ca}^{2+}$ -activated ALG-2 associate with ALIX. (B) ANX7, ALG-2, and ALIX form a complex that migrates to the plasma membrane. (C) ALG-2 complex initiates the assembly of ESCRT-III and Vps4 at the membrane injury. (D) Sequential membrane remodeling and membrane scission by ESCRT pathway. Other ESCRT distinct complexes involve in the recruitment and membrane repair process are not shown here.

Recent studies used cell viability following electroporation membrane lesions as a measure for membrane repair. An ALG-2 variant lacking the ability to bind  $\text{Ca}^{2+}$  due to substitutions in the EF-1 and EF-3 domains shows lower cell survival compared with controls [217]. On the other hand, overexpression of wild-type ALG-2 increases cell viability of lesion-damaged cells [217]. Furthermore, cell viability decreases when the ALIX-binding site on ALG-2 is blocked, supporting the importance of an ALG-2/ALIX interaction for the repair model proposed by Scheffer [217,223].

## Conclusions

Plasma membrane repair is an emergency response system, essential for maintaining cellular homeostasis and ensuring cell survival. The rapid influx of extracellular  $\text{Ca}^{2+}$  upon membrane rupture is one of the primary signals to initiate the repair process. Recruitment of multiple  $\text{Ca}^{2+}$ -dependent sensor proteins has been identified that display multiple membrane repair mechanisms. It is likely that these protein sensors co-ordinate a diverse set of repair responses tailored to the location, size, and nature of the membrane injury. Defective membrane repair, frequently due to mutations in genes that code for repair proteins, is now recognized as a contributor to different forms of MD muscle disease and heart disease. Considering all known protein components work together and have distinct roles in membrane repair it is likely that no single mechanism, nor therapeutic solution, applies in all injury scenarios. Although some three-dimensional structure information is available for some individual proteins the atomic level details of the interactions between nearly all repair proteins are missing. This information is urgently needed as the foundation for possible pharmaceutical therapies. In addition, it is likely that other possible mediators and physiological conditions exist that control membrane repair mechanisms that have yet to be resolved. Many of these aspects should be identified to gain a full understanding of the membrane repair machinery and provide new avenues for future treatments of inherited diseases.

## Competing Interests

The authors declare that there are no competing interests associated with the manuscript.

## Funding

This research was supported by a research [grant number G-20-0028739] from the Heart and Stroke Foundation of Canada (GSS).

## CRediT Author Contribution

**Ziwei Li:** Conceptualization, Data curation, Writing—original draft, Writing—review & editing. **Gary S. Shaw:** Conceptualization, Supervision, Funding acquisition, Writing—original draft, Project administration, Writing—review & editing.

## Abbreviations

2D, two-dimensional; ALG-2, apoptosis-linked gene 2; ALIX, ALG-2-interacting protein X; ANX1, annexin A1; ANX2, annexin A2; ANX4, annexin A4; ANX5, annexin A5; ANX6, annexin A6; Ca<sup>2+</sup>, calcium; CRISPR, clustered regularly interspaced short palindromic repeats; ESCRT, endosomal sorting complex required for transport; FLIM, fluorescence lifetime imaging microscopy; K<sub>d</sub>, dissociation constant; LGMD2B, limb-girdle muscular dystrophy type 2B; LGMDR1, limb-girdle muscular dystrophy recessive type 1; MD, muscular dystrophy; PEF, penta-EF-hand; PFT, pore-forming toxin; PS, phosphatidylserine; SNAP-25, 25 kDa synaptosomal-associated protein; SNARE, Soluble N-ethylmaleimide sensitive factor Attachment protein Receptor; Syt, synaptotagmin; Syt7, synaptotagmin VII.

## References

- McNeil, P.L. and Khakee, R. (1992) Disruptions of muscle fiber plasma membranes. Role in exercise-induced damage. *Am. J. Pathol.* **140**, 1097–1109
- Howard, A.C., McNeil, A.K. and McNeil, P.L. (2011) Promotion of plasma membrane repair by vitamin E. *Nat. Commun.* **2**, 597, <https://doi.org/10.1038/ncomms1594>
- Forrester, S.J., Kikuchi, D.S., Hernandez, M.S., Xu, Q. and Griendling, K.K. (2018) Reactive oxygen species in metabolic and inflammatory signaling. *Circ. Res.* **122**, 877–902, <https://doi.org/10.1161/CIRCRESAHA.117.311401>
- Su, L.J., Zhang, J.H., Gomez, H., Murugan, R., Hong, X., Xu, D. et al. (2019) Reactive oxygen species-induced lipid peroxidation in apoptosis, autophagy, and ferroptosis. *Oxidative Med. Cell. Longevity* **2019**, 5080843, <https://doi.org/10.1155/2019/5080843>
- Zorov, D.B., Juhaszova, M. and Sollott, S.J. (2006) Mitochondrial ROS-induced ROS release: an update and review. *Biochim. Biophys. Acta* **1757**, 509–517, <https://doi.org/10.1016/j.bbapbio.2006.04.029>
- Anura, A. (2014) Traumatic oral mucosal lesions: a mini review and clinical update. *Oral Health Dent. Manag.* **13**, 254–259
- Khowal, S. and Wajid, S. (2019) Role of smoking-mediated molecular events in the genesis of oral cancers. *Toxicol. Mech. Methods* **29**, 665–685, <https://doi.org/10.1080/15376516.2019.1646372>
- Cobb, J.P., Hotchkiss, R.S., Karl, I.E. and Buchman, T.G. (1996) Mechanisms of cell injury and death. *Br. J. Anaesth.* **77**, 3–10, <https://doi.org/10.1093/bja/77.1.3>
- Maiti, P., Manna, J. and Dunbar, G.L. (2017) Current understanding of the molecular mechanisms in Parkinson's disease: Targets for potential treatments. *Transl. Neurodegener.* **6**, 28, <https://doi.org/10.1186/s40035-017-0099-z>
- Agnihotri, A. and Aruoma, O.I. (2020) Alzheimer's Disease and Parkinson's Disease: a nutritional toxicology perspective of the impact of oxidative stress, mitochondrial dysfunction, nutrigenomics and environmental chemicals. *J. Am. Coll. Nutr.* **39**, 16–27, <https://doi.org/10.1080/07315724.2019.1683379>
- Dias, C. and Nylandsted, J. (2021) Plasma membrane integrity in health and disease: significance and therapeutic potential. *Cell Discov.* **7**, 4, <https://doi.org/10.1038/s41421-020-00233-2>
- Cooper, S.T. and McNeil, P.L. (2015) Membrane repair: mechanisms and pathophysiology. *Physiol. Rev.* **95**, 1205–1240, <https://doi.org/10.1152/physrev.00037.2014>
- Kitmitto, A., Baudoin, F. and Cartwright, E.J. (2019) Cardiomyocyte damage control in heart failure and the role of the sarcolemma. *J. Muscle Res. Cell Motil.* **40**, 319–333, <https://doi.org/10.1007/s10974-019-09539-5>
- Stow, J.L. and Condon, N.D. (2016) The cell surface environment for pathogen recognition and entry. *Clin. Transl. Immunol.* **5**, e71, <https://doi.org/10.1038/cti.2016.15>
- Dal Peraro, M. and van der Goot, F.G. (2016) Pore-forming toxins: ancient, but never really out of fashion. *Nat. Rev. Microbiol.* **14**, 77–92, <https://doi.org/10.1038/nrmicro.2015.3>
- Coburn, B., Sekirov, I. and Finlay, B.B. (2007) Type III secretion systems and disease. *Clin. Microbiol. Rev.* **20**, 535–549, <https://doi.org/10.1128/CMR.00013-07>
- Tang, T., Bidon, M., Jaimes, J.A., Whittaker, G.R. and Daniel, S. (2020) Coronavirus membrane fusion mechanism offers a potential target for antiviral development. *Antiviral Res.* **178**, 104792, <https://doi.org/10.1016/j.antiviral.2020.104792>
- McNeil, P.L. and Steinhart, R.A. (1997) Loss, restoration, and maintenance of plasma membrane integrity. *J. Cell Biol.* **137**, 1–4, <https://doi.org/10.1083/jcb.137.1.1>
- Ammendolia, D.A., Bement, W.M. and Brumell, J.H. (2021) Plasma membrane integrity: implications for health and disease. *BMC Biol.* **19**, 71, <https://doi.org/10.1186/s12915-021-00972-y>

- 20 Bi, G.Q., Alderton, J.M. and Steinhardt, R.A. (1995) Calcium-regulated exocytosis is required for cell membrane resealing. *J. Cell Biol.* **131**, 1747–1758, <https://doi.org/10.1083/jcb.131.6.1747>
- 21 Bement, W.M., Mandato, C.A. and Kirsch, M.N. (1999) Wound-induced assembly and closure of an actomyosin purse string in *Xenopus* oocytes. *Curr. Biol.* **9**, 579–587, [https://doi.org/10.1016/S0960-9822\(99\)80261-9](https://doi.org/10.1016/S0960-9822(99)80261-9)
- 22 Zhen, Y., Radulovic, M., Vietri, M. and Stenmark, H. (2021) Sealing holes in cellular membranes. *EMBO J.* **40**, e106922, <https://doi.org/10.15252/embj.2020106922>
- 23 Andrews, N.W., Almeida, P.E. and Corrotte, M. (2014) Damage control: cellular mechanisms of plasma membrane repair. *Trends Cell Biol.* **24**, 734–742, <https://doi.org/10.1016/j.tcb.2014.07.008>
- 24 Andrews, N.W. and Corrotte, M. (2018) Plasma membrane repair. *Curr. Biol.* **28**, R392–R397, <https://doi.org/10.1016/j.cub.2017.12.034>
- 25 Draeger, A., Schoenauer, R., Atanasoff, A.P., Wolfmeier, H. and Babychuk, E.B. (2014) Dealing with damage: plasma membrane repair mechanisms. *Biochimie* **107**, 66–72, <https://doi.org/10.1016/j.biochi.2014.08.008>
- 26 Blazek, A.D., Paleo, B.J. and Weisleder, N. (2015) Plasma membrane repair: a central process for maintaining cellular homeostasis. *Physiology* **30**, 438–448, <https://doi.org/10.1152/physiol.00019.2015>
- 27 Jimenez, A.J. and Perez, F. (2017) Plasma membrane repair: the adaptable cell life-insurance. *Curr. Opin. Cell Biol.* **47**, 99–107, <https://doi.org/10.1016/j.ceb.2017.03.011>
- 28 Lovering, R.M., Porter, N.C. and Bloch, R.J. (2005) The muscular dystrophies: from genes to therapies. *Phys. Ther.* **85**, 1372–1388, <https://doi.org/10.1093/ptj/85.12.1372>
- 29 Howell, G.J., Holloway, Z.G., Cobbold, C., Monaco, A.P. and Ponnambalam, S. (2006) Cell biology of membrane trafficking in human disease. *Int. Rev. Cytol.* **252**, 1–69, [https://doi.org/10.1016/S0074-7696\(06\)52005-4](https://doi.org/10.1016/S0074-7696(06)52005-4)
- 30 Davies, K.E. and Nowak, K.J. (2006) Molecular mechanisms of muscular dystrophies: old and new players. *Nat. Rev. Mol. Cell Biol.* **7**, 762–773, <https://doi.org/10.1038/nrm2024>
- 31 Gazzzerro, E., Sotgia, F., Bruno, C., Lisanti, M.P. and Minetti, C. (2010) Caveolinopathies: from the biology of caveolin-3 to human diseases. *Eur. J. Human Genet.* **18**, 137–145, <https://doi.org/10.1038/ejhg.2009.103>
- 32 Han, R. (2011) Muscle membrane repair and inflammatory attack in dysferlinopathy. *Skelet. Muscle* **1**, 10, <https://doi.org/10.1186/2044-5040-1-10>
- 33 McElhanon, K.E., Young, N., Hampton, J., Paleo, B.J., Kwiatkowski, T.A., Beck, E.X. et al. (2020) Autoantibodies targeting TRIM72 compromise membrane repair and contribute to inflammatory myopathy. *J. Clin. Invest.* **130**, 4440–4455, <https://doi.org/10.1172/JCI131721>
- 34 Chakrabarti, S., Kobayashi, K.S., Flavell, R.A., Marks, C.B., Miyake, K., Liston, D.R. et al. (2003) Impaired membrane resealing and autoimmune myositis in synaptotagmin VII-deficient mice. *J. Cell Biol.* **162**, 543–549, <https://doi.org/10.1083/jcb.200305131>
- 35 Koenig, M., Monaco, A.P. and Kunkel, L.M. (1988) The complete sequence of dystrophin predicts a rod-shaped cytoskeletal protein. *Cell* **53**, 219–228, [https://doi.org/10.1016/0092-8674\(88\)90383-2](https://doi.org/10.1016/0092-8674(88)90383-2)
- 36 Gao, Q.Q. and McNally, E.M. (2015) The dystrophin complex: structure, function, and implications for therapy. *Compr. Physiol.* **5**, 1223–1239, <https://doi.org/10.1002/cphy.c140048>
- 37 Kitmitto, A., Baudoin, F. and Cartwright, E.J. (2019) Cardiomyocyte damage control in heart failure and the role of the sarcolemma. *J. Muscle Res. Cell Motil.* **40**, 319–333, <https://doi.org/10.1007/s10974-019-09539-5>
- 38 Benevolensky, D., Belikova, Y., Mohammadzadeh, R., Trouvé, P., Marotte, F., Russo-Marie, F. et al. (2000) Expression and localization of the annexins II, V, and VI in myocardium from patients with end-stage heart failure. *Lab. Invest.* **80**, 123–133, <https://doi.org/10.1038/labinvest.3780016>
- 39 Matteo, R.G. and Moravec, C.S. (2000) Immunolocalization of annexins IV, V and VI in the failing and non-failing human heart. *Cardiovasc. Res.* **45**, 961–970, [https://doi.org/10.1016/S0008-6363\(99\)00409-5](https://doi.org/10.1016/S0008-6363(99)00409-5)
- 40 Weisleder, N., Takizawa, N., Lin, P., Wang, X., Cao, C., Zhang, Y. et al. (2012) Recombinant MG53 protein modulates therapeutic cell membrane repair in treatment of muscular dystrophy. *Sci. Transl. Med.* **4**, 139ra85, <https://doi.org/10.1126/scitranslmed.3003921>
- 41 He, B., Tang, R.H., Weisleder, N., Xiao, B., Yuan, Z., Cai, C. et al. (2012) Enhancing muscle membrane repair by gene delivery of MG53 ameliorates muscular dystrophy and heart failure in  $\delta$ -Sarcoglycan-deficient hamsters. *Mol. Ther.* **20**, 727–735, <https://doi.org/10.1038/mt.2012.5>
- 42 Wang, X., Xie, W., Zhang, Y., Lin, P., Han, L., Han, P. et al. (2010) Cardioprotection of ischemia/reperfusion injury by cholesterol-dependent MG53-mediated membrane repair. *Circ. Res.* **107**, 76–83, <https://doi.org/10.1161/CIRCRESAHA.109.215822>
- 43 Liu, J., Zhu, H., Zheng, Y., Xu, Z., Li, L., Tan, T. et al. (2015) Cardioprotection of recombinant human MG53 protein in a porcine model of ischemia and reperfusion injury. *J. Mol. Cell Cardiol.* **80**, 10–19, <https://doi.org/10.1016/j.yjmcc.2014.12.010>
- 44 Homsy, J., Zaidi, S., Shen, Y., Ware, J.S., Samocha, K.E., Karczewski, K.J. et al. (2015) De novo mutations in congenital heart disease with neurodevelopmental and other congenital anomalies. *Science* **350**, 1262–1266, <https://doi.org/10.1126/science.aac9396>
- 45 Zhou, Y., Qian, Z., Yang, J., Zhu, M., Hou, X., Wang, Y. et al. (2018) Whole exome sequencing identifies novel candidate mutations in a Chinese family with left ventricular noncompaction. *Mol. Med. Rep.* **17**, 7325–7330, <https://doi.org/10.3892/mmr.2018.8777>
- 46 Kim, S.C., Kellett, T., Wang, S., Nishi, M., Nagre, N., Zhou, B. et al. (2014) TRIM72 is required for effective repair of alveolar epithelial cell wounding. *Am. J. Physiol. Lung Cell. Mol. Physiol.* **307**, L449–L459
- 47 Jin, Y., Lee, S.J., Minshall, R.D. and Choi, A.M. (2011) Caveolin-1: a critical regulator of lung injury. *Am. J. Physiol. Lung Cell. Mol. Physiol.* **300**, L151–L160
- 48 Potter, R.A., Griffin, D.A., Sondergaard, P.C., Johnson, R.W., Pozsgai, E.R., Heller, K.N. et al. (2018) Systemic delivery of dysferlin overlap vectors provides long-term gene expression and functional improvement for dysferlinopathy. *Hum. Gene Ther.* **29**, 749–762, <https://doi.org/10.1089/hum.2017.062>
- 49 Lee, J.J.A., Maruyama, R., Duddy, W., Sakurai, H. and Yokota, T. (2018) Identification of novel antisense-mediated exon skipping targets in DYSF for therapeutic treatment of dysferlinopathy. *Mol. Ther. Nucleic Acids* **13**, 596–604, <https://doi.org/10.1016/j.omtn.2018.10.004>

- 50 Turan, S., Farruggio, A.P., Sriba, W., Day, J.W. and Calos, M.P. (2016) Precise correction of disease mutations in induced pluripotent stem cells derived from patients with limb girdle muscular dystrophy. *Mol. Ther.* **24**, 685–696, <https://doi.org/10.1038/mt.2016.40>
- 51 Liu, J., Aoki, M., Illa, I., Wu, C., Fardeau, M., Angelini, C. et al. (1998) Dysferlin, a novel skeletal muscle gene, is mutated in Miyoshi myopathy and limb girdle muscular dystrophy. *Nat. Genet.* **20**, 31–36, <https://doi.org/10.1038/1682>
- 52 Nguyen, K., Bassez, G., Bernard, R., Krahn, M., Labelle, V., Figarella-Branger, D. et al. (2005) Dysferlin mutations in LGMD2B, Miyoshi myopathy, and atypical dysferlinopathies. *Hum. Mutat.* **26**, 165, <https://doi.org/10.1002/humu.9355>
- 53 Lennon, N.J., Kho, A., Bacskai, B.J., Perlmutter, S.L., Hyman, B.T. and Brown, Jr, R.H. (2003) Dysferlin interacts with annexins A1 and A2 and mediates sarcolemmal wound-healing. *J. Biol. Chem.* **278**, 50466–50473, <https://doi.org/10.1074/jbc.M307247200>
- 54 Berridge, M.J., Lipp, P. and Bootman, M.D. (2000) The versatility and universality of calcium signalling. *Nat. Rev. Mol. Cell Biol.* **1**, 11–21, <https://doi.org/10.1038/35036035>
- 55 Berridge, M.J., Bootman, M.D. and Roderick, H.L. (2003) Calcium signalling: dynamics, homeostasis and remodelling. *Nat. Rev. Mol. Cell Biol.* **4**, 517–529, <https://doi.org/10.1038/nrm1155>
- 56 Clapham, D.E. (2007) Calcium signaling. *Cell* **131**, 1047–1058, <https://doi.org/10.1016/j.cell.2007.11.028>
- 57 Inesi, G. and Tadini-Buoninsegni, F. (2014) Ca(2+)/H(+) exchange, lumenal Ca(2+) release and Ca(2+)/ATP coupling ratios in the sarcoplasmic reticulum ATPase. *J. Cell Commun. Signal.* **8**, 5–11
- 58 Schwaller, B. (2010) Cytosolic Ca<sup>2+</sup> buffers. *Cold Spring Harbor Perspect. Biol.* **2**, a004051, <https://doi.org/10.1101/cshperspect.a004051>
- 59 Grabarek, Z. (2006) Structural basis for diversity of the EF-hand calcium-binding proteins. *J. Mol. Biol.* **359**, 509–525, <https://doi.org/10.1016/j.jmb.2006.03.066>
- 60 Gifford, J.L., Walsh, M.P. and Vogel, H.J. (2007) Structures and metal-ion-binding properties of the Ca<sup>2+</sup>-binding helix-loop-helix EF-hand motifs. *Biochem. J.* **405**, 199–221, <https://doi.org/10.1042/BJ20070255>
- 61 Chazin, W.J. (2011) Relating form and function of EF-hand calcium binding proteins. *Acc. Chem. Res.* **44**, 171–179, <https://doi.org/10.1021/ar100110d>
- 62 Heizmann, C.W. (2019) Ca<sup>2+</sup>-binding proteins of the EF-hand superfamily: diagnostic and prognostic biomarkers and novel therapeutic targets. *Methods Mol. Biol.* **1929**, 157–186, [https://doi.org/10.1007/978-1-4939-9030-6\\_11](https://doi.org/10.1007/978-1-4939-9030-6_11)
- 63 Cheng, X., Zhang, X., Yu, L. and Xu, H. (2015) Calcium signaling in membrane repair. *Semin. Cell Dev. Biol.* **45**, 24–31, <https://doi.org/10.1016/j.semcdb.2015.10.031>
- 64 Karatekin, E., Sandre, O., Guitouni, H., Borghi, N., Puech, P.H. and Brochard-Wyart, F. (2003) Cascades of transient pores in giant vesicles: line tension and transport. *Biophys. J.* **84**, 1734–1749, [https://doi.org/10.1016/S0006-3495\(03\)74981-9](https://doi.org/10.1016/S0006-3495(03)74981-9)
- 65 McNeil, P.L., Miyake, K. and Vogel, S.S. (2003) The endomembrane requirement for cell surface repair. *PNAS* **100**, 4592–4597, <https://doi.org/10.1073/pnas.0736739100>
- 66 Gozen, I. and Dommersnes, P. (2014) Pore dynamics in lipid membranes. *Eur. Phys. J. Spec. Top.* **223**, 1813–1829, <https://doi.org/10.1140/epjst/e2014-02228-5>
- 67 Terasaki, M., Miyake, K. and McNeil, P.L. (1997) Large plasma membrane disruptions are rapidly resealed by Ca<sup>2+</sup>-dependent vesicle-vesicle fusion events. *J. Cell Biol.* **139**, 63–74, <https://doi.org/10.1083/jcb.139.1.63>
- 68 Lek, A., Evesson, F.J., Lemckert, F.A., Redpath, G.M., Lueders, A.K., Turnbull, L. et al. (2013) Calpains, cleaved mini-dysferlinC72, and L-type channels underpin calcium-dependent muscle membrane repair. *J. Neurosci.* **33**, 5085–5094, <https://doi.org/10.1523/JNEUROSCI.3560-12.2013>
- 69 Duan, X., Chan, K.T., Lee, K.K. and Mak, A.F. (2015) Oxidative stress and plasma membrane repair in single myoblasts after femtosecond laser photoporation. *Ann. Biomed. Eng.* **43**, 2735–2744, <https://doi.org/10.1007/s10439-015-1341-4>
- 70 Reddy, A., Caler, E.V. and Andrews, N.W. (2001) Plasma membrane repair is mediated by Ca(2+)-regulated exocytosis of lysosomes. *Cell* **106**, 157–169, [https://doi.org/10.1016/S0092-8674\(01\)00421-4](https://doi.org/10.1016/S0092-8674(01)00421-4)
- 71 Jimenez, A.J., Maiuri, P., Lafaurie-Janvore, J., Divoux, S., Piel, M. and Perez, F. (2014) ESCRT machinery is required for plasma membrane repair. *Science* **343**, 1247136, <https://doi.org/10.1126/science.1247136>
- 72 Keyel, P.A., Loultcheva, L., Roth, R., Salter, R.D., Watkins, S.C., Yokoyama, W.M. et al. (2011) Streptolysin O clearance through sequestration into blebs that bud passively from the plasma membrane. *J. Cell Sci.* **124**, 2414–2423, <https://doi.org/10.1242/jcs.076182>
- 73 McNeil, P.L. and Kirchhausen, T. (2005) An emergency response team for membrane repair. *Nat. Rev. Mol. Cell Biol.* **6**, 499–505, <https://doi.org/10.1038/nrm1665>
- 74 Andrews, N.W. (2005) Membrane resealing: synaptotagmin VII keeps running the show. *Sci. STKE* **2005**, pe19, <https://doi.org/10.1126/stke.2822005pe19>
- 75 Boye, T.L. and Nylandsted, J. (2016) Annexins in plasma membrane repair. *Biol. Chem.* **397**, 961–969, <https://doi.org/10.1515/hsz-2016-0171>
- 76 Bansal, D. and Campbell, K.P. (2004) Dysferlin and the plasma membrane repair in muscular dystrophy. *Trends Cell Biol.* **14**, 206–213, <https://doi.org/10.1016/j.tcb.2004.03.001>
- 77 Horn, A. and Jaiswal, J.K. (2018) Cellular mechanisms and signals that coordinate plasma membrane repair. *Cell. Mol. Life Sci.* **75**, 3751–3770, <https://doi.org/10.1007/s00018-018-2888-7>
- 78 Idone, V., Tam, C., Goss, J.W., Toomre, D., Pypaert, M. and Andrews, N.W. (2008) Repair of injured plasma membrane by rapid Ca<sup>2+</sup>-dependent endocytosis. *J. Cell Biol.* **180**, 905–914, <https://doi.org/10.1083/jcb.200708010>
- 79 Corrotte, M., Fernandes, M.C., Tam, C. and Andrews, N.W. (2012) Toxin pores endocytosed during plasma membrane repair traffic into the lumen of MVBs for degradation. *Traffic* **13**, 483–494, <https://doi.org/10.1111/j.1600-0854.2011.01323.x>
- 80 Babychuk, E.B. and Draeger, A. (2015) Defying death: cellular survival strategies following plasmalemmal injury by bacterial toxins. *Semin. Cell Dev. Biol.* **45**, 39–47, <https://doi.org/10.1016/j.semcdb.2015.10.016>

- 81 Gerke, V., Creutz, C.E. and Moss, S.E. (2005) Annexins: linking Ca<sup>2+</sup> signalling to membrane dynamics. *Nat. Rev. Mol. Cell Biol.* **6**, 449–461, <https://doi.org/10.1038/nrm1661>
- 82 Cai, C., Masumiya, H., Weisleder, N., Matsuda, N., Nishi, M., Hwang, M. et al. (2009) MG53 nucleates assembly of cell membrane repair machinery. *Nat. Cell Biol.* **11**, 56–64, <https://doi.org/10.1038/ncb1812>
- 83 Draeger, A., Monastyrskaya, K. and Babychuk, E.B. (2011) Plasma membrane repair and cellular damage control: the annexin survival kit. *Biochem. Pharmacol.* **81**, 703–712, <https://doi.org/10.1016/j.bcp.2010.12.027>
- 84 Koerdtt, S.N., Ashraf, A. and Gerke, V. (2019) Annexins and plasma membrane repair. *Curr. Top. Membr.* **84**, 43–65, <https://doi.org/10.1016/bs.ctm.2019.07.006>
- 85 Lee, J. and Littleton, J.T. (2015) Transmembrane tethering of synaptotagmin to synaptic vesicles controls multiple modes of neurotransmitter release. *PNAS* **112**, 3793–3798, <https://doi.org/10.1073/pnas.1420312112>
- 86 Craxton, M. (2004) Synaptotagmin gene content of the sequenced genomes. *BMC Genomics* **5**, 43, <https://doi.org/10.1186/1471-2164-5-43>
- 87 Südhof, T.C. (2002) Synaptotagmins: why so many? *J. Biol. Chem.* **277**, 7629–7632, <https://doi.org/10.1074/jbc.R100052200>
- 88 Öhrfelt, A., Brinkmalm, A., Dumurgier, J., Brinkmalm, G., Hansson, O., Zetterberg, H. et al. (2016) The pre-synaptic vesicle protein synaptotagmin is a novel biomarker for Alzheimer's disease. *Alzheimers Res. Ther.* **8**, 41, <https://doi.org/10.1186/s13195-016-0208-8>
- 89 Coussens, L., Parker, P.J., Rhee, L., Yang-Feng, T.L., Chen, E., Waterfield, M.D. et al. (1986) Multiple, distinct forms of bovine and human protein kinase C suggest diversity in cellular signaling pathways. *Science* **233**, 859–866, <https://doi.org/10.1126/science.3755548>
- 90 Kohout, S.C., Corbalán-García, S., Torrecillas, A., Gómez-Fernández, J.C. and Falke, J.J. (2002) C2 domains of protein kinase C isoforms alpha, beta, and gamma: activation parameters and calcium stoichiometries of the membrane-bound state. *Biochemistry* **41**, 11411–11424, <https://doi.org/10.1021/bi026041k>
- 91 Sutton, R.B., Davletov, B.A., Berghuis, A.M., Südhof, T.C. and Sprang, S.R. (1995) Structure of the first C2 domain of synaptotagmin I: a novel Ca<sup>2+</sup>/phospholipid-binding fold. *Cell* **80**, 929–938, [https://doi.org/10.1016/0092-8674\(95\)90296-1](https://doi.org/10.1016/0092-8674(95)90296-1)
- 92 Sutton, R.B., Ernst, J.A. and Brunger, A.T. (1999) Crystal structure of the cytosolic C2A-C2B domains of synaptotagmin III. Implications for Ca<sup>2+</sup>-independent snare complex interaction. *J. Cell Biol.* **147**, 589–598, <https://doi.org/10.1083/jcb.147.3.589>
- 93 Dai, H., Shin, O.H., Machius, M., Tomchick, D.R., Südhof, T.C. and Rizo, J. (2004) Structural basis for the evolutionary inactivation of Ca<sup>2+</sup> binding to synaptotagmin 4. *Nat. Struct. Mol. Biol.* **11**, 844–849, <https://doi.org/10.1038/nsmb817>
- 94 Qiu, X., Ge, J., Gao, Y., Teng, M. and Niu, L. (2017) Structural analysis of Ca<sup>2+</sup>-binding pocket of synaptotagmin 5 C2A domain. *Int. J. Biol. Macromol.* **95**, 946–953, <https://doi.org/10.1016/j.ijbiomac.2016.10.083>
- 95 Xue, M., Craig, T.K., Shin, O.H., Li, L., Brautigam, C.A., Tomchick, D.R. et al. (2010) Structural and mutational analysis of functional differentiation between synaptotagmins-1 and -7. *PLoS ONE* **5**, e12544, <https://doi.org/10.1371/journal.pone.0012544>
- 96 Corbalán-García, S. and Gómez-Fernández, J.C. (2014) Signaling through C2 domains: more than one lipid target. *Biochim. Biophys. Acta* **1838**, 1536–1547, <https://doi.org/10.1016/j.bbame.2014.01.008>
- 97 Südhof, T.C. (2012) Calcium control of neurotransmitter release. *Cold Spring Harbor Perspect. Biol.* **4**, a011353, <https://doi.org/10.1101/cshperspect.a011353>
- 98 Guillén, J., Ferrer-Orta, C., Buxaderas, M., Pérez-Sánchez, D., Guerrero-Valero, M., Luengo-Gil, G. et al. (2013) Structural insights into the Ca<sup>2+</sup> and PI(4,5)P<sub>2</sub> binding modes of the C2 domains of rabphilin 3A and synaptotagmin 1. *PNAS* **110**, 20503–20508, <https://doi.org/10.1073/pnas.1316179110>
- 99 Ubach, J., Zhang, X., Shao, X., Südhof, T.C. and Rizo, J. (1998) Ca<sup>2+</sup> binding to synaptotagmin: how many Ca<sup>2+</sup> ions bind to the tip of a C2-domain? *EMBO J.* **17**, 3921–3930, <https://doi.org/10.1093/emboj/17.14.3921>
- 100 Nalefski, E.A. and Falke, J.J. (1996) The C2 domain calcium-binding motif: structural and functional diversity. *Protein Sci.* **5**, 2375–2390, <https://doi.org/10.1002/pro.5560051201>
- 101 Radhakrishnan, A., Stein, A., Jahn, R. and Fasshauer, D. (2009) The Ca<sup>2+</sup> affinity of synaptotagmin 1 is markedly increased by a specific interaction of its C2B domain with phosphatidylinositol 4,5-bisphosphate. *J. Biol. Chem.* **284**, 25749–25760, <https://doi.org/10.1074/jbc.M109.042499>
- 102 Guerrero-Valero, M., Ferrer-Orta, C., Querol-Audi, J., Marin-Vicente, C., Fita, I., Gómez-Fernández, J.C. et al. (2009) Structural and mechanistic insights into the association of PKCα-C2 domain to PtdIns(4,5)P<sub>2</sub>. *PNAS* **106**, 6603–6607, <https://doi.org/10.1073/pnas.0813099106>
- 103 Sugita, S., Shin, O.H., Han, W., Lao, Y. and Südhof, T.C. (2002) Synaptotagmins form a hierarchy of exocytotic Ca<sup>2+</sup> sensors with distinct Ca<sup>2+</sup> affinities. *EMBO J.* **21**, 270–280, <https://doi.org/10.1093/emboj/21.3.270>
- 104 Shao, X., Fernandez, I., Südhof, T.C. and Rizo, J. (1998) Solution structures of the Ca<sup>2+</sup>-free and Ca<sup>2+</sup>-bound C2A domain of synaptotagmin I: does Ca<sup>2+</sup> induce a conformational change? *Biochemistry* **37**, 16106–16115, <https://doi.org/10.1021/bi981789h>
- 105 Geppert, M., Goda, Y., Hammer, R.E., Li, C., Rosahl, T.W., Stevens, C.F. et al. (1994) Synaptotagmin I: a major Ca<sup>2+</sup> sensor for transmitter release at a central synapse. *Cell* **79**, 717–727, [https://doi.org/10.1016/0092-8674\(94\)90556-8](https://doi.org/10.1016/0092-8674(94)90556-8)
- 106 Ramakrishnan, S., Bera, M., Coleman, J., Rothman, J.E. and Krishnakumar, S.S. (2020) Synergistic roles of synaptotagmin-1 and complexin in calcium-regulated neuronal exocytosis. *eLife* **9**, e54506, <https://doi.org/10.7554/eLife.54506>
- 107 de Wit, H., Walter, A.M., Milosevic, I., Gulyás-Kovács, A., Riedel, D., Sørensen, J.B. et al. (2009) Synaptotagmin-1 docks secretory vesicles to syntaxin-1/SNAP-25 acceptor complexes. *Cell* **138**, 935–946, <https://doi.org/10.1016/j.cell.2009.07.027>
- 108 Carr, C.M. and Munson, M. (2007) Tag team action at the synapse. *EMBO Rep.* **8**, 834–838, <https://doi.org/10.1038/sj.embor.7401051>
- 109 Kim, J.Y., Choi, B.K., Choi, M.G., Kim, S.A., Lai, Y., Shin, Y.K. et al. (2012) Solution single-vesicle assay reveals PIP<sub>2</sub>-mediated sequential actions of synaptotagmin-1 on SNAREs. *EMBO J.* **31**, 2144–2155, <https://doi.org/10.1038/emboj.2012.57>
- 110 Yoon, T.Y. and Munson, M. (2018) SNARE complex assembly and disassembly. *Curr. Biol.* **28**, R397–R401, <https://doi.org/10.1016/j.cub.2018.01.005>
- 111 Voletti, R., Jaczynska, K. and Rizo, J. (2020) Ca<sup>2+</sup>-dependent release of synaptotagmin-1 from the SNARE complex on phosphatidylinositol 4,5-bisphosphate-containing membranes. *eLife* **9**, e57154, <https://doi.org/10.7554/eLife.57154>

- 112 Zhou, Q., Zhou, P., Wang, A.L., Wu, D., Zhao, M., Südhof, T.C. et al. (2017) The primed SNARE-complexin-synaptotagmin complex for neuronal exocytosis. *Nature* **548**, 420–425, <https://doi.org/10.1038/nature23484>
- 113 Brunger, A.T., Choi, U.B., Lai, Y., Leitz, J., White, K.I. and Zhou, Q. (2019) The pre-synaptic fusion machinery. *Curr. Opin. Struct. Biol.* **54**, 179–188, <https://doi.org/10.1016/j.sbi.2019.03.007>
- 114 Zhou, Q., Lai, Y., Bacaj, T., Zhao, M., Lyubimov, A.Y., Uervirojnangkoon, M. et al. (2015) Architecture of the synaptotagmin-SNARE machinery for neuronal exocytosis. *Nature* **525**, 62–67, <https://doi.org/10.1038/nature14975>
- 115 Li, F., Pincet, F., Perez, E., Eng, W.S., Melia, T.J., Rothman, J.E. et al. (2007) Energetics and dynamics of SNAREpin folding across lipid bilayers. *Nat. Struct. Mol. Biol.* **14**, 890–896, <https://doi.org/10.1038/nsmb1310>
- 116 Courtney, N.A., Bao, H., Briguglio, J.S. and Chapman, E.R. (2019) Synaptotagmin 1 clamps synaptic vesicle fusion in mammalian neurons independent of complexin. *Nat. Commun.* **10**, 4076, <https://doi.org/10.1038/s41467-019-12015-w>
- 117 Grote, E., Baba, M., Ohsumi, Y. and Novick, P.J. (2000) Geranylgeranylated SNAREs are dominant inhibitors of membrane fusion. *J. Cell Biol.* **151**, 453–466, <https://doi.org/10.1083/jcb.151.2.453>
- 118 Han, J., Pluhackova, K. and Böckmann, R.A. (2017) The multifaceted role of SNARE proteins in membrane fusion. *Front. Physiol.* **8**, 5, <https://doi.org/10.3389/fphys.2017.00005>
- 119 Schapire, A.L., Voigt, B., Jasik, J., Rosado, A., Lopez-Cobollo, R., Menzel, D. et al. (2008) Arabidopsis synaptotagmin 1 is required for the maintenance of plasma membrane integrity and cell viability. *Plant Cell* **20**, 3374–3388, <https://doi.org/10.1105/tpc.108.063859>
- 120 Yamazaki, T., Kawamura, Y., Minami, A. and Uemura, M. (2008) Calcium-dependent freezing tolerance in Arabidopsis involves membrane resealing via synaptotagmin SYT1. *Plant Cell* **20**, 3389–3404, <https://doi.org/10.1105/tpc.108.062679>
- 121 Martinez, I., Chakrabarti, S., Hellevik, T., Morehead, J., Fowler, K. and Andrews, N.W. (2000) Synaptotagmin VII regulates Ca(2+)-dependent exocytosis of lysosomes in fibroblasts. *J. Cell Biol.* **148**, 1141–1149, <https://doi.org/10.1083/jcb.148.6.1141>
- 122 Dolai, S., Xie, L., Zhu, D., Liang, T., Qin, T., Xie, H. et al. (2016) Synaptotagmin-7 functions to replenish insulin granules for exocytosis in human islet  $\beta$ -cells. *Diabetes* **65**, 1962–1976, <https://doi.org/10.2337/db15-1436>
- 123 Bhalla, A., Tucker, W.C. and Chapman, E.R. (2005) Synaptotagmin isoforms couple distinct ranges of Ca<sup>2+</sup>, Ba<sup>2+</sup>, and Sr<sup>2+</sup> concentration to SNARE-mediated membrane fusion. *Mol. Biol. Cell* **16**, 4755–4764, <https://doi.org/10.1091/mbc.e05-04-0277>
- 124 Rao, S.K., Huynh, C., Proux-Gillardeaux, V., Galli, T. and Andrews, N.W. (2004) Identification of SNAREs involved in synaptotagmin VII-regulated lysosomal exocytosis. *J. Biol. Chem.* **279**, 20471–20479, <https://doi.org/10.1074/jbc.M400798200>
- 125 Bansal, D., Miyake, K., Vogel, S.S., Groh, S., Chen, C.C., Williamson, R. et al. (2003) Defective membrane repair in dysferlin-deficient muscular dystrophy. *Nature* **423**, 168–172, <https://doi.org/10.1038/nature01573>
- 126 Roche, J.A., Lovering, R.M., Roche, R., Ru, L.W., Reed, P.W. and Bloch, R.J. (2010) Extensive mononuclear infiltration and myogenesis characterize recovery of dysferlin-null skeletal muscle from contraction-induced injuries. *Am. J. Physiol. Cell Physiol.* **298**, C298–C312, <https://doi.org/10.1152/ajpcell.00122.2009>
- 127 Diaz-Manera, J., Touvier, T., Dellavalle, A., Tonlorenzi, R., Tedesco, F.S., Messina, G. et al. (2010) Partial dysferlin reconstitution by adult murine mesoangioblasts is sufficient for full functional recovery in a murine model of dysferlinopathy. *Cell Death Dis.* **1**, e61, <https://doi.org/10.1038/cddis.2010.35>
- 128 Piccolo, F., Moore, S.A., Ford, G.C. and Campbell, K.P. (2000) Intracellular accumulation and reduced sarcolemmal expression of dysferlin in limb-girdle muscular dystrophies. *Ann. Neurol.* **48**, 902–912, [https://doi.org/10.1002/1531-8249\(200012\)48:6%3c902::AID-ANA11%3e3.0.CO;2-Z](https://doi.org/10.1002/1531-8249(200012)48:6%3c902::AID-ANA11%3e3.0.CO;2-Z)
- 129 Millay, D.P., Maillet, M., Roche, J.A., Sargent, M.A., McNally, E.M., Bloch, R.J. et al. (2009) Genetic manipulation of dysferlin expression in skeletal muscle: novel insights into muscular dystrophy. *Am. J. Pathol.* **175**, 1817–1823, <https://doi.org/10.2353/ajpath.2009.090107>
- 130 Kobayashi, K., Izawa, T., Kuwamura, M. and Yamate, J. (2011) Comparative gene expression analysis in the skeletal muscles of dysferlin-deficient SJL/J and A/J mice. *J. Toxicologic Pathol.* **24**, 49–62, <https://doi.org/10.1293/tox.24.49>
- 131 Kerr, J.P., Ziman, A.P., Mueller, A.L., Muriel, J.M., Kleinhans-Welte, E., Gumerson, J.D. et al. (2013) Dysferlin stabilizes stress-induced Ca<sup>2+</sup> signaling in the transverse tubule membrane. *PNAS* **110**, 20831–20836, <https://doi.org/10.1073/pnas.1307960110>
- 132 Abdullah, N., Padmanarayana, M., Marty, N.J. and Johnson, C.P. (2014) Quantitation of the calcium and membrane binding properties of the C2 domains of dysferlin. *Biophys. J.* **106**, 382–389, <https://doi.org/10.1016/j.bpj.2013.11.4492>
- 133 Therrien, C., Di Fulvio, S., Pickles, S. and Sinnreich, M. (2009) Characterization of lipid binding specificities of dysferlin C2 domains reveals novel interactions with phosphoinositides. *Biochemistry* **48**, 2377–2384, <https://doi.org/10.1021/bi802242r>
- 134 Fuson, K., Rice, A., Mahling, R., Snow, A., Nayak, K., Shanbhogue, P. et al. (2014) Alternate splicing of dysferlin C2A confers Ca<sup>2+</sup>-dependent and Ca<sup>2+</sup>-independent binding for membrane repair. *Structure* **22**, 104–115, <https://doi.org/10.1016/j.str.2013.10.001>
- 135 Wang, Y., Tadayon, R., Santamaria, L., Mercier, P., Forristal, C.J. and Shaw, G.S. (2021) Calcium binds and rigidifies the dysferlin C2A domain in a tightly coupled manner. *Biochem. J.* **478**, 197–215, <https://doi.org/10.1042/BCJ20200773>
- 136 Sula, A., Cole, A.R., Yeats, C., Orengo, C. and Keep, N.H. (2014) Crystal structures of the human Dysferlin inner DysF domain. *BMC Struct. Biol.* **14**, 3, <https://doi.org/10.1186/1472-6807-14-3>
- 137 Patel, P., Harris, R., Geddes, S.M., Strehle, E.M., Watson, J.D., Bashir, R. et al. (2008) Solution structure of the inner DysF domain of myoferlin and implications for limb girdle muscular dystrophy type 2b. *J. Mol. Biol.* **379**, 981–990, <https://doi.org/10.1016/j.jmb.2008.04.046>
- 138 Therrien, C., Dodig, D., Karpatis, G. and Sinnreich, M. (2006) Mutation impact on dysferlin inferred from database analysis and computer-based structural predictions. *J. Neurol. Sci.* **250**, 71–78, <https://doi.org/10.1016/j.jns.2006.07.004>
- 139 Fujita, E., Kourouk, Y., Isoai, A., Kumagai, H., Misutani, A., Matsuda, C. et al. (2007) Two endoplasmic reticulum-associated degradation (ERAD) systems for the novel variant of the mutant dysferlin: ubiquitin/proteasome ERAD(I) and autophagy/lysosome ERAD(II). *Hum. Mol. Genet.* **16**, 618–629, <https://doi.org/10.1093/hmg/ddm002>

- 140 Xu, L., Pallikkuth, S., Hou, Z., Mignery, G.A., Robia, S.L. and Han, R. (2011) Dysferlin forms a dimer mediated by the C2 domains and the transmembrane domain in vitro and in living cells. *PLoS ONE* **6**, e27884, <https://doi.org/10.1371/journal.pone.0027884>
- 141 Woolger, N., Bournazos, A., Sophocleous, R.A., Evesson, F.J., Lek, A., Driemer, B. et al. (2017) Limited proteolysis as a tool to probe the tertiary conformation of dysferlin and structural consequences of patient missense variant L344P. *J. Biol. Chem.* **292**, 18577–18591, <https://doi.org/10.1074/jbc.M117.790014>
- 142 Dominguez, M.J., McCord, J.J. and Sutton, R.B. (2022) Redefining the architecture of ferlin proteins: insights into multi-domain protein structure and function. *PLoS ONE* **17**, e0270188, <https://doi.org/10.1371/journal.pone.0270188>
- 143 Han, R. and Campbell, K.P. (2007) Dysferlin and muscle membrane repair. *Curr. Opin. Cell Biol.* **19**, 409–416, <https://doi.org/10.1016/j.ceb.2007.07.001>
- 144 McDade, J.R. and Michele, D.E. (2014) Membrane damage-induced vesicle-vesicle fusion of dysferlin-containing vesicles in muscle cells requires microtubules and kinesin. *Hum. Mol. Genet.* **23**, 1677–1686, <https://doi.org/10.1093/hmg/ddt557>
- 145 Leung, C., Utokaparch, S., Sharma, A., Yu, C., Abraham, T., Borchers, C. et al. (2011) Proteomic identification of dysferlin-interacting protein complexes in human vascular endothelium. *Biochem. Biophys. Res. Commun.* **415**, 263–269, <https://doi.org/10.1016/j.bbrc.2011.10.031>
- 146 Huang, Y., Laval, S.H., van Remoortere, A., Baudier, J., Benaud, C., Anderson, L.V. et al. (2007) AHNK, a novel component of the dysferlin protein complex, redistributes to the cytoplasm with dysferlin during skeletal muscle regeneration. *FASEB J.* **21**, 732–742, <https://doi.org/10.1096/fj.06-6628com>
- 147 de Morree, A., Hensbergen, P.J., van Haagen, H.H., Dragan, I., Deelder, A.M., 't Hoen, P.A. et al. (2010) Proteomic analysis of the dysferlin protein complex unveils its importance for sarcolemmal maintenance and integrity. *PLoS ONE* **5**, e13854, <https://doi.org/10.1371/journal.pone.0013854>
- 148 Assadi, M., Schindler, T., Muller, B., Porter, J.D., Ruegg, M.A. and Langen, H. (2008) Identification of proteins interacting with dysferlin using the tandem affinity purification method. *Open Cell Dev. Biol. J.* **1**, 17–23, <https://doi.org/10.2174/1874085500801010017>
- 149 Hernández-Deviez, D.J., Howes, M.T., Laval, S.H., Bushby, K., Hancock, J.F. and Parton, R.G. (2008) Caveolin regulates endocytosis of the muscle repair protein, dysferlin. *J. Biol. Chem.* **283**, 6476–6488, <https://doi.org/10.1074/jbc.M708776200>
- 150 Matsuda, C., Miyake, K., Kameyama, K., Keduka, E., Takeshima, H., Imamura, T. et al. (2012) The C2A domain in dysferlin is important for association with MG53 (TRIM72). *PLoS Curr.* **4**, e5035add8caff4, <https://doi.org/10.1371/5035add8caff4>
- 151 Borgonovo, B., Cocucci, E., Racchetti, G., Podini, P., Bachi, A. and Meldolesi, J. (2002) Regulated exocytosis: a novel, widely expressed system. *Nat. Cell Biol.* **4**, 955–962, <https://doi.org/10.1038/ncb888>
- 152 Bittel, D.C., Chandra, G., Tirunagiri, L., Deora, A.B., Medikayala, S., Scheffer, L. et al. (2020) Annexin A2 mediates dysferlin accumulation and muscle cell membrane repair. *Cells* **9**, 1919, <https://doi.org/10.3390/cells9091919>
- 153 Erikson, E., Tomasiewicz, H.G. and Erikson, R.L. (1984) Biochemical characterization of a 34-kilodalton normal cellular substrate of pp60v-src and an associated 6-kilodalton protein. *Mol. Cell. Biol.* **4**, 77–85
- 154 Gerke, V. and Weber, K. (1985) The regulatory chain in the p36-kD substrate complex of viral tyrosine-specific protein kinases is related in sequence to the S-100 protein of glial cells. *EMBO J.* **4**, 2917–2920, <https://doi.org/10.1002/j.1460-2075.1985.tb04023.x>
- 155 De Seranno, S., Benaud, C., Assard, N., Khediri, S., Gerke, V., Baudier, J. et al. (2006) Identification of an AHNK binding motif specific for the Annexin2/S100A10 tetramer. *J. Biol. Chem.* **281**, 35030–35038, <https://doi.org/10.1074/jbc.M606545200>
- 156 Rezvanpour, A., Santamaria-Kisiel, L. and Shaw, G.S. (2011) The S100A10-annexin A2 complex provides a novel asymmetric platform for membrane repair. *J. Biol. Chem.* **286**, 40174–40183, <https://doi.org/10.1074/jbc.M111.244038>
- 157 Dempsey, B.R., Rezvanpour, A., Lee, T.W., Barber, K.R., Junop, M.S. and Shaw, G.S. (2012) Structure of an asymmetric ternary protein complex provides insight for membrane interaction. *Structure* **20**, 1737–1745, <https://doi.org/10.1016/j.str.2012.08.004>
- 158 Ozorowski, G., Milton, S. and Luecke, H. (2013) Structure of a C-terminal AHNK peptide in a 1:2:2 complex with S100A10 and an acetylated N-terminal peptide of annexin A2. *Acta Crystallogr. D*, **69**, 92–104, <https://doi.org/10.1107/S0907444912043429>
- 159 Johnson, G.V. and Guttman, R.P. (1997) Calpains: intact and active? *Bioessays* **19**, 1011–1018, <https://doi.org/10.1002/bies.950191111>
- 160 Campbell, R.L. and Davies, P.L. (2012) Structure-function relationships in calpains. *Biochem. J.* **447**, 335–351, <https://doi.org/10.1042/BJ20120921>
- 161 Hanna, R.A., Campbell, R.L. and Davies, P.L. (2008) Calcium-bound structure of calpain and its mechanism of inhibition by calpastatin. *Nature* **456**, 409–412, <https://doi.org/10.1038/nature07451>
- 162 Moldoveanu, T., Hosfield, C.M., Lim, D., Elce, J.S., Jia, Z. and Davies, P.L. (2002) A Ca(2+) switch aligns the active site of calpain. *Cell* **108**, 649–660, [https://doi.org/10.1016/S0092-8674\(02\)00659-1](https://doi.org/10.1016/S0092-8674(02)00659-1)
- 163 Hosfield, C.M., Elce, J.S., Davies, P.L. and Jia, Z. (1999) Crystal structure of calpain reveals the structural basis for Ca(2+)-dependent protease activity and a novel mode of enzyme activation. *EMBO J.* **18**, 6880–6889, <https://doi.org/10.1093/emboj/18.24.6880>
- 164 Mellgren, R.L., Zhang, W., Miyake, K. and McNeil, P.L. (2007) Calpain is required for the rapid, calcium-dependent repair of wounded plasma membrane. *J. Biol. Chem.* **282**, 2567–2575, <https://doi.org/10.1074/jbc.M604560200>
- 165 Mellgren, R.L., Miyake, K., Kramerova, I., Spencer, M.J., Bourg, N., Bartoli, M. et al. (2009) Calcium-dependent plasma membrane repair requires m- or mu-calpain, but not calpain-3, the proteasome, or caspases. *Biochim. Biophys. Acta* **1793**, 1886–1893, <https://doi.org/10.1016/j.bbamcr.2009.09.013>
- 166 Piper, A.K., Sophocleous, R.A., Ross, S.E., Evesson, F.J., Saleh, O., Bournazos, A. et al. (2020) Loss of calpains-1 and -2 prevents repair of plasma membrane scrape injuries, but not small pores, and induces a severe muscular dystrophy. *Am. J. Physiol. Cell Physiol.* **318**, C1226–C1237, <https://doi.org/10.1152/ajpcell.00408.2019>
- 167 Godell, C.M., Smyers, M.E., Eddleman, C.S., Ballinger, M.L., Fishman, H.M. and Bittner, G.D. (1997) Calpain activity promotes the sealing of severed giant axons. *PNAS* **94**, 4751–4756, <https://doi.org/10.1073/pnas.94.9.4751>
- 168 Redpath, G.M., Woolger, N., Piper, A.K., Lemckert, F.A., Lek, A., Greer, P.A. et al. (2014) Calpain cleavage within dysferlin exon 40a releases a synaptotagmin-like module for membrane repair. *Mol. Biol. Cell* **25**, 3037–3048, <https://doi.org/10.1091/mbc.e14-04-0947>

- 169 Krahn, M., Wein, N., Bartoli, M., Lostal, W., Courrier, S., Bourg-Alibert, N. et al. (2010) A naturally occurring human minidysferlin protein repairs sarcolemmal lesions in a mouse model of dysferlinopathy. *Sci. Transl. Med.* **2**, 50ra69, <https://doi.org/10.1126/scitranslmed.3000951>
- 170 Ballouhey, O., Courrier, S., Kergourlay, V., Gorokhova, S., Cerino, M., Krahn, M. et al. (2021) The dysferlin transcript containing the alternative exon 40a is essential for myocyte functions. *Front. Cell Dev. Biol.* **9**, 754555, <https://doi.org/10.3389/fcell.2021.754555>
- 171 Huang, Y., de Morrée, A., van Remoortere, A., Bushby, K., Frants, R.R., den Dunnen, J.T. et al. (2008) Calpain 3 is a modulator of the dysferlin protein complex in skeletal muscle. *Hum. Mol. Genet.* **17**, 1855–1866, <https://doi.org/10.1093/hmg/ddn081>
- 172 Taveau, M., Bourg, N., Sillon, G., Roudaut, C., Bartoli, M. and Richard, I. (2003) Calpain 3 is activated through autolysis within the active site and lyses sarcomeric and sarcolemmal components. *Mol. Cell. Biol.* **23**, 9127–9135, <https://doi.org/10.1128/MCB.23.24.9127-9135.2003>
- 173 Kourie, J.I. and Wood, H.B. (2000) Biophysical and molecular properties of annexin-formed channels. *Prog. Biophys. Mol. Biol.* **73**, 91–134, [https://doi.org/10.1016/S0079-6107\(00\)00003-1](https://doi.org/10.1016/S0079-6107(00)00003-1)
- 174 Swairjo, M.A. and Seaton, B.A. (1994) Annexin structure and membrane interactions: a molecular perspective. *Annu. Rev. Biophys. Biomol. Struct.* **23**, 193–213, <https://doi.org/10.1146/annurev.bb.23.060194.001205>
- 175 Jin, M., Smith, C., Hsieh, H.Y., Gibson, D.F. and Tait, J.F. (2004) Essential role of B-helix calcium binding sites in annexin V-membrane binding. *J. Biol. Chem.* **279**, 40351–40357, <https://doi.org/10.1074/jbc.M405846200>
- 176 Sopkova, J., Renouard, M. and Lewit-Bentley, A. (1993) The crystal structure of a new high-calcium form of annexin V. *J. Mol. Biol.* **234**, 816–825, <https://doi.org/10.1006/jmbi.1993.1627>
- 177 Ando, Y., Imamura, S., Hong, Y.M., Owada, M.K., Kakunaga, T. and Kannagi, R. (1989) Enhancement of calcium sensitivity of lipocortin I in phospholipid binding induced by limited proteolysis and phosphorylation at the amino terminus as analyzed by phospholipid affinity column chromatography. *J. Biol. Chem.* **264**, 6948–6955, [https://doi.org/10.1016/S0021-9258\(18\)83523-2](https://doi.org/10.1016/S0021-9258(18)83523-2)
- 178 Weng, X., Luecke, H., Song, I.S., Kang, D.S., Kim, S.H. and Huber, R. (1993) Crystal structure of human annexin I at 2.5 Å resolution. *Protein Sci.* **2**, 448–458, <https://doi.org/10.1002/pro.5560020317>
- 179 Raynal, P. and Pollard, H.B. (1994) Annexins: the problem of assessing the biological role for a gene family of multifunctional calcium- and phospholipid-binding proteins. *Biochim. Biophys. Acta* **1197**, 63–93, [https://doi.org/10.1016/0304-4157\(94\)90019-1](https://doi.org/10.1016/0304-4157(94)90019-1)
- 180 Pigault, C., Föllénus-Wund, A., Lux, B. and Gérard, D. (1990) A fluorescence spectroscopy study of the calpactin I complex and its subunits p11 and p36: calcium-dependent conformation changes. *Biochim. Biophys. Acta* **1037**, 106–114, [https://doi.org/10.1016/0167-4838\(90\)90108-R](https://doi.org/10.1016/0167-4838(90)90108-R)
- 181 Shadle, P.J., Gerke, V. and Weber, K. (1985) Three Ca<sup>2+</sup>-binding proteins from porcine liver and intestine differ immunologically and physicochemically and are distinct in Ca<sup>2+</sup> affinities. *J. Biol. Chem.* **260**, 16354–16360, [https://doi.org/10.1016/S0021-9258\(17\)36244-0](https://doi.org/10.1016/S0021-9258(17)36244-0)
- 182 Monastyrskaya, K., Babiychuk, E.B., Hostettler, A., Rescher, U. and Draeger, A. (2007) Annexins as intracellular calcium sensors. *Cell Calcium* **41**, 207–219, <https://doi.org/10.1016/j.ceca.2006.06.008>
- 183 Rosengarth, A. and Luecke, H. (2003) A calcium-driven conformational switch of the N-terminal and core domains of annexin A1. *J. Mol. Biol.* **326**, 1317–1325, [https://doi.org/10.1016/S0022-2836\(03\)00027-5](https://doi.org/10.1016/S0022-2836(03)00027-5)
- 184 Réty, S., Osterloh, D., Arié, J.P., Tabaries, S., Seeman, J., Russo-Marie, F. et al. (2000) Structural basis of the Ca(2+)-dependent association between S100C (S100A11) and its target, the N-terminal part of annexin I. *Structure* **8**, 175–184, [https://doi.org/10.1016/S0969-2126\(00\)00093-9](https://doi.org/10.1016/S0969-2126(00)00093-9)
- 185 Réty, S., Sopkova, J., Renouard, M., Osterloh, D., Gerke, V., Tabaries, S. et al. (1999) The crystal structure of a complex of p11 with the annexin II N-terminal peptide. *Nat. Struct. Biol.* **6**, 89–95, <https://doi.org/10.1038/4965>
- 186 Santamaria-Kisiel, L., Rintala-Dempsey, A.C. and Shaw, G.S. (2006) Calcium-dependent and -independent interactions of the S100 protein family. *Biochem. J.* **396**, 201–214, <https://doi.org/10.1042/BJ20060195>
- 187 Baudier, J., Deloulme, J.C. and Shaw, G.S. (2020) The Zn<sup>2+</sup> and Ca<sup>2+</sup>-binding S100B and S100A1 proteins: beyond the myths. *Biol. Rev. Camb. Philos. Soc.* **95**, 738–758, <https://doi.org/10.1111/brv.12585>
- 188 Weisz, J. and Uversky, V.N. (2020) Zooming into the dark side of human annexin-S100 complexes: dynamic alliance of flexible partners. *Int. J. Mol. Sci.* **21**, 5879, <https://doi.org/10.3390/ijms21165879>
- 189 Sopkova-De Oliveira Santos, J., Fischer, S., Guilbert, C., Lewit-Bentley, A. and Smith, J.C. (2000) Pathway for large-scale conformational change in annexin V. *Biochemistry* **39**, 14065–14074, <https://doi.org/10.1021/bi000659h>
- 190 Bharadwaj, A., Kempster, E. and Waisman, D.M. (2021) The annexin A2/S100A10 complex: the mutualistic symbiosis of two distinct proteins. *Biomolecules* **11**, 1849, <https://doi.org/10.3390/biom11121849>
- 191 Rintala-Dempsey, A.C., Santamaria-Kisiel, L., Liao, Y., Lajoie, G. and Shaw, G.S. (2006) Insights into S100 target specificity examined by a new interaction between S100A11 and annexin A2. *Biochemistry* **45**, 14695–14705, <https://doi.org/10.1021/bi061754e>
- 192 Ecsédi, P., Kiss, B., Gógl, G., Radnai, L., Buday, L., Koprivanac, K. et al. (2017) Regulation of the equilibrium between closed and open conformations of annexin A2 by N-terminal phosphorylation and S100A4-binding. *Structure* **25**, 1195.e5–1207.e5, <https://doi.org/10.1016/j.str.2017.06.001>
- 193 Ecsédi, P., Gógl, G., Hóf, H., Kiss, B., Harmat, V. and Nyitrai, L. (2020) Structure determination of the transactivation domain of p53 in complex with S100A4 using annexin A2 as a crystallization chaperone. *Structure* **28**, 943.e4–953.e4, <https://doi.org/10.1016/j.str.2020.05.001>
- 194 Nedjadi, T., Kitteringham, N., Campbell, F., Jenkins, R.E., Park, B.K., Navarro, P. et al. (2009) S100A6 binds to annexin 2 in pancreatic cancer cells and promotes pancreatic cancer cell motility. *Br. J. Cancer* **101**, 1145–1154, <https://doi.org/10.1038/sj.bjc.6605289>
- 195 Semov, A., Moreno, M.J., Onichtchenko, A., Abulrob, A., Ball, M., Ekiel, I. et al. (2005) Metastasis-associated protein S100A4 induces angiogenesis through interaction with annexin II and accelerated plasmin formation. *J. Biol. Chem.* **280**, 20833–20841, <https://doi.org/10.1074/jbc.M412653200>
- 196 Puisieux, A., Ji, J. and Ozturk, M. (1996) Annexin II up-regulates cellular levels of p11 protein by a post-translational mechanisms. *Biochem. J.* **313**, 51–55, <https://doi.org/10.1042/bj3130051>
- 197 Caplan, J.F., Filipenko, N.R., Fitzpatrick, S.L. and Waisman, D.M. (2004) Regulation of annexin A2 by reversible glutathionylation. *J. Biol. Chem.* **279**, 7740–7750, <https://doi.org/10.1074/jbc.M313049200>

- 198 Chasserot-Golaz, S., Vitale, N., Umbrecht-Jenck, E., Knight, D., Gerke, V. and Bader, M.F. (2005) Annexin 2 promotes the formation of lipid microdomains required for calcium-regulated exocytosis of dense-core vesicles. *Mol. Biol. Cell* **16**, 1108–1119, <https://doi.org/10.1091/mbc.e04-07-0627>
- 199 Croissant, C., Gounou, C., Bouvet, F., Tan, S. and Bouter, A. (2022) Trafficking of annexins during membrane repair in human skeletal muscle cells. *Membranes* **12**, 153, <https://doi.org/10.3390/membranes12020153>
- 200 Roostalu, U. and Strähle, U. (2012) In vivo imaging of molecular interactions at damaged sarcolemma. *Dev. Cell* **22**, 515–529, <https://doi.org/10.1016/j.devcel.2011.12.008>
- 201 Leikina, E., Defour, A., Melikov, K., Van der Meulen, J.H., Nagaraju, K., Bhuvanendran, S. et al. (2015) Annexin A1 deficiency does not affect myofiber repair but delays regeneration of injured muscles. *Sci. Rep.* **5**, 18246, <https://doi.org/10.1038/srep18246>
- 202 Defour, A., Medikayala, S., Van der Meulen, J.H., Hogarth, M.W., Holdreith, N., Malatras, A. et al. (2017) Annexin A2 links poor myofiber repair with inflammation and adipogenic replacement of the injured muscle. *Hum. Mol. Genet.* **26**, 1979–1991, <https://doi.org/10.1093/hmg/ddx065>
- 203 Grewal, T., Wason, S.J., Enrich, C. and Rentero, C. (2016) Annexins - insights from knockout mice. *Biol. Chem.* **397**, 1031–1053, <https://doi.org/10.1515/hsz-2016-0168>
- 204 McNeil, A.K., Rescher, U., Gerke, V. and McNeil, P.L. (2006) Requirement for annexin A1 in plasma membrane repair. *J. Biol. Chem.* **281**, 35202–35207, <https://doi.org/10.1074/jbc.M606406200>
- 205 Jaiswal, J.K., Lauritzen, S.P., Scheffer, L., Sakaguchi, M., Bunkenborg, J., Simon, S.M. et al. (2014) S100A11 is required for efficient plasma membrane repair and survival of invasive cancer cells. *Nat. Commun.* **5**, 3795, <https://doi.org/10.1038/ncomms4795>
- 206 Glover, L. and Brown, Jr, R.H. (2007) Dysferlin in membrane trafficking and patch repair. *Traffic* **8**, 785–794, <https://doi.org/10.1111/j.1600-0854.2007.00573.x>
- 207 Reviakine, I., Bergsma-Schutter, W. and Brisson, A. (1998) Growth of protein 2-D crystals on supported planar lipid bilayers imaged in situ by AFM. *J. Struct. Biol.* **121**, 356–361, <https://doi.org/10.1006/jsbi.1998.4003>
- 208 Carmelle, R., Bouvet, F., Tan, S., Croissant, C., Gounou, C., Mamchaoui, K. et al. (2016) Membrane repair of human skeletal muscle cells requires Annexin-A5. *Biochim. Biophys. Acta* **1863**, 2267–2279, <https://doi.org/10.1016/j.bbamcr.2016.06.003>
- 209 Lin, Y.C., Chipot, C. and Scheuring, S. (2020) Annexin-V stabilizes membrane defects by inducing lipid phase transition. *Nat. Commun.* **11**, 230, <https://doi.org/10.1038/s41467-019-14045-w>
- 210 Bouter, A., Gounou, C., Bérat, R., Tan, S., Gallois, B., Granier, T., d'Estaintot, B.L. et al. (2011) Annexin-A5 assembled into two-dimensional arrays promotes cell membrane repair. *Nat. Commun.* **2**, 270, <https://doi.org/10.1038/ncomms1270>
- 211 Kaetzel, M.A., Mo, Y.D., Mealy, T.R., Campos, B., Bergsma-Schutter, W., Brisson, A. et al. (2001) Phosphorylation mutants elucidate the mechanism of annexin IV-mediated membrane aggregation. *Biochemistry* **40**, 4192–4199, <https://doi.org/10.1021/bi002507s>
- 212 Boye, T.L., Maeda, K., Pezeshkian, W., Sønder, S.L., Haeger, S.C., Gerke, V. et al. (2017) Annexin A4 and A6 induce membrane curvature and constriction during cell membrane repair. *Nat. Commun.* **8**, 1623, <https://doi.org/10.1038/s41467-017-01743-6>
- 213 Demonbreun, A.R., Fallon, K.S., Oosterbaan, C.C., Bogdanovic, E., Warner, J.L., Sell, J.J. et al. (2019) Recombinant annexin A6 promotes membrane repair and protects against muscle injury. *J. Clin. Invest.* **129**, 4657–4670, <https://doi.org/10.1172/JCI128840>
- 214 Jang, I.K., Hu, R., Lacanà, E., D'Adamio, L. and Gu, H. (2002) Apoptosis-linked gene 2-deficient mice exhibit normal T-cell development and function. *Mol. Cell. Biol.* **22**, 4094–4100, <https://doi.org/10.1128/MCB.22.12.4094-4100.2002>
- 215 Missotten, M., Nichols, A., Rieger, K. and Sadoul, R. (1999) Alix, a novel mouse protein undergoing calcium-dependent interaction with the apoptosis-linked-gene 2 (ALG-2) protein. *Cell Death Differ.* **6**, 124–129, <https://doi.org/10.1038/sj.cdd.4400456>
- 216 Katoh, K., Shibata, H., Suzuki, H., Nara, A., Ishidoh, K., Kominami, E. et al. (2003) The ALG-2-interacting protein Alix associates with CHMP4b, a human homologue of yeast Snf7 that is involved in multivesicular body sorting. *J. Biol. Chem.* **278**, 39104–39113, <https://doi.org/10.1074/jbc.M301604200>
- 217 la Cour, J.M., Winding Gojkovic, P., Ambjørner, S., Bagge, J., Jensen, S.M., Panina, S. et al. (2018) ALG-2 participates in recovery of cells after plasma membrane damage by electroporation and digitonin treatment. *PLoS ONE* **13**, e0204520, <https://doi.org/10.1371/journal.pone.0204520>
- 218 Subramanian, L., Crabb, J.W., Cox, J., Durussel, I., Walker, T.M., van Ginkel, P.R. et al. (2004) Ca<sup>2+</sup> binding to EF hands 1 and 3 is essential for the interaction of apoptosis-linked gene-2 with Alix/AIP1 in ocular melanoma. *Biochemistry* **43**, 11175–11186, <https://doi.org/10.1021/bi048848d>
- 219 Maki, M., Suzuki, H. and Shibata, H. (2011) Structure and function of ALG-2, a penta-EF-hand calcium-dependent adaptor protein. *Sci. China Life Sci.* **54**, 770–779, <https://doi.org/10.1007/s11427-011-4204-8>
- 220 Lo, K.W., Zhang, Q., Li, M. and Zhang, M. (1999) Apoptosis-linked gene product ALG-2 is a new member of the calpain small subunit subfamily of Ca<sup>2+</sup>-binding proteins. *Biochemistry* **38**, 7498–7508, <https://doi.org/10.1021/bi990034n>
- 221 Kitaura, Y., Matsumoto, S., Satoh, H., Hitomi, K. and Maki, M. (2001) Peflin and ALG-2, members of the penta-EF-hand protein family, form a heterodimer that dissociates in a Ca<sup>2+</sup>-dependent manner. *J. Biol. Chem.* **276**, 14053–14058, <https://doi.org/10.1074/jbc.M008649200>
- 222 Maki, M., Yamaguchi, K., Kitaura, Y., Satoh, H. and Hitomi, K. (1998) Calcium-induced exposure of a hydrophobic surface of mouse ALG-2, which is a member of the penta-EF-hand protein family. *J. Biochem.* **124**, 1170–1177, <https://doi.org/10.1093/oxfordjournals.jbchem.a022235>
- 223 Scheffer, L.L., Sreetama, S.C., Sharma, N., Medikayala, S., Brown, K.J., Defour, A. et al. (2014) Mechanism of Ca<sup>2+</sup>-triggered ESCRT assembly and regulation of cell membrane repair. *Nat. Commun.* **5**, 5646, <https://doi.org/10.1038/ncomms5646>
- 224 Hurley, J.H. (2015) ESCRTs are everywhere. *EMBO J.* **34**, 2398–2407, <https://doi.org/10.15252/embj.201592484>
- 225 McCullough, J., Fisher, R.D., Whitby, F.G., Sundquist, W.I. and Hill, C.P. (2008) ALIX-CHMP4 interactions in the human ESCRT pathway. *PNAS* **105**, 7687–7691, <https://doi.org/10.1073/pnas.0801567105>
- 226 Larios, J., Mercier, V., Roux, A. and Gruenberg, J. (2020) ALIX- and ESCRT-III-dependent sorting of tetraspanins to exosomes. *J. Cell Biol.* **219**, e201904113, <https://doi.org/10.1083/jcb.201904113>

- 227 Sønder, S.L., Boye, T.L., Tölle, R., Dengjel, J., Maeda, K., Jäättelä, M. et al. (2019) Annexin A7 is required for ESCRT III-mediated plasma membrane repair. *Sci. Rep.* **9**, 6726, <https://doi.org/10.1038/s41598-019-43143-4>
- 228 Schlaepfer, D.D. and Haigler, H.T. (1987) Characterization of Ca<sup>2+</sup>-dependent phospholipid binding and phosphorylation of lipocortin I. *J. Biol. Chem.* **262**, 6931–6937, [https://doi.org/10.1016/S0021-9258\(18\)48333-0](https://doi.org/10.1016/S0021-9258(18)48333-0)
- 229 Glenney, J. (1986) Phospholipid-dependent Ca<sup>2+</sup> binding by the 36-kDa tyrosine kinase substrate (calpactin) and its 33-kDa core. *J. Biol. Chem.* **261**, 7247–7252, [https://doi.org/10.1016/S0021-9258\(17\)38382-5](https://doi.org/10.1016/S0021-9258(17)38382-5)
